# Supplementary material for: Increasing the accuracy of protein loop structure prediction with evolutionary constraints
Source: Oxford University Press journal article supplement (doi:10.1093/bioinformatics/bty996), 2018-12-07
Supplement: bioinformatics_35_15_2585_s4.pdf [file bioinformatics_35_15_2585_s4.pdf]

# Increasing the accuracy of protein loop structure prediction with predicted contacts

## Supplementary Information

### Contents

1. Training set details
2. General target set:
  - (a) MetaPSICOV contact prediction results
  - (b)  $N_{eff}$  vs accuracy of predicted contacts
  - (c) Alignment gaps vs. accuracy of predicted contacts/loop structure prediction
  - (d) Full Sphinx results
  - (e) Accuracy of predicted contacts vs. improvement in structure prediction
  - (f) Inclusion of trivial contacts
  - (g) Location of predicted contact residues
  - (h) Full MODELLER results
  - (i) MODELLER RMSD distributions
3. General target set, non-native environment:
  - (a) Accuracy of MODELLER-generated protein models
  - (b) Full Sphinx results
4. Membrane protein target set:
  - (a) MetaPSICOV contact prediction results
  - (b) Full Sphinx results
  - (c) Full MODELLER results

## 1. Training set details

| Target        | Length |
|---------------|--------|
| 1SMRA_113_118 | 6      |
| 4J3VA_313_318 | 6      |
| 3U1LA_78_83   | 6      |
| 2JC5A_150_155 | 6      |
| 4L6DA_270_275 | 6      |
| 1TRBA_289_294 | 6      |
| 1Q35A_237_242 | 6      |
| 1VHEA_267_272 | 6      |
| 1S9RA_348_353 | 6      |
| 1OFDA_218_223 | 6      |
| 4X00A_175_182 | 8      |
| 3PVKA_176_183 | 8      |
| 1TKEA_47_54   | 8      |
| 3GVEA_59_66   | 8      |
| 1F46A_118_125 | 8      |
| 2CARA_103_110 | 8      |
| 2YNAA_241_248 | 8      |
| 2BW4A_221_228 | 8      |
| 2Z9WA_115_122 | 8      |
| 1N08A_85_92   | 8      |
| 3KHYA_165_174 | 10     |
| 2CFCA_208_217 | 10     |
| 4CI7A_480_489 | 10     |
| 2OEMA_271_280 | 10     |
| 2DRIA_89_98   | 10     |
| 3KWEA_130_139 | 10     |
| 1PG4A_450_459 | 10     |
| 1NHSA_362_371 | 10     |
| 4GEKA_116_125 | 10     |
| 3DCIA_117_126 | 10     |
| 2DDXA_155_166 | 12     |
| 2NUWA_7_18    | 12     |
| 1EOKA_170_181 | 12     |
| 4I3GA_198_209 | 12     |
| 4G29A_294_305 | 12     |
| 1VHQA_148_159 | 12     |
| 4GWIA_81_92   | 12     |
| 3AMNA_121_132 | 12     |
| 4AG1A_56_67   | 12     |
| 4MJKA_145_156 | 12     |

| Target          | Length |
|-----------------|--------|
| 3W8KA_200_213   | 14     |
| 4R3FA_66_79     | 14     |
| 1GPOA_1593_1606 | 14     |
| 2GDMA_44_57     | 14     |
| 4P6BA_277_290   | 14     |
| 2Q4WA_422_435   | 14     |
| 1KV9A_288_301   | 14     |
| 4WKSC_715_728   | 14     |
| 3F4LA_153_166   | 14     |
| 2AXQA_321_334   | 14     |
| 2R16A_857_872   | 16     |
| 4FE9A_326_341   | 16     |
| 1EI5A_139_154   | 16     |
| 2DDBA_18_33     | 16     |
| 1RGZA_112_127   | 16     |
| 4J94A_133_148   | 16     |
| 1QCXA_12_27     | 16     |
| 3R6AA_26_41     | 16     |
| 1EOKA_127_142   | 16     |
| 4LIHA_453_468   | 16     |
| 4X84A_86_103    | 18     |
| 2Y8TA_127_144   | 18     |
| 1RP0A_71_88     | 18     |
| 4P3FA_96_113    | 18     |
| 4CC2A_1521_1538 | 18     |
| 2OCGA_78_95     | 18     |
| 2OCTA_32_49     | 18     |
| 3T8WA_133_150   | 18     |
| 4JICA_268_285   | 18     |
| 1V4AA_212_229   | 18     |

## 2. General target set results

### (a) MetaPSICOV contact prediction results - contacts involving at least one target loop residue

| Target          | Length | No Predicted | No Correct | Target          | Length | No Predicted | No Correct |
|-----------------|--------|--------------|------------|-----------------|--------|--------------|------------|
| 1F74A_105_114   | 10     | 22           | 13         | 3UN7A_461_474   | 14     | 18           | 10         |
| 1NU4A_73_82     | 10     | 26           | 22         | 3ZO9A_554_567   | 14     | 5            | 0          |
| 1YOPA_168_177   | 10     | 6            | 4          | 4AUKA_27_40     | 14     | 27           | 18         |
| 1ZJCA_18_27     | 10     | 16           | 13         | 4B4DA_236_249   | 14     | 1            | 1          |
| 2IVFA_677_686   | 10     | 7            | 3          | 4MDYA_204_217   | 14     | 6            | 3          |
| 2PN1A_95_104    | 10     | 31           | 24         | 4NOGA_100_113   | 14     | 1            | 1          |
| 3JQYA_109_118   | 10     | 21           | 7          | 4P5PA_183_196   | 14     | 52           | 26         |
| 3PHXB_127_136   | 10     | 10           | 9          | 1APYA_49_63     | 15     | 23           | 14         |
| 4FFJA_164_173   | 10     | 14           | 9          | 1KQPA_205_219   | 15     | 18           | 9          |
| 4MGQA_173_182   | 10     | 16           | 13         | 1N5UA_490_504   | 15     | 2            | 1          |
| 4N68A_955_964   | 10     | 35           | 24         | 1ODMA_74_88     | 15     | -            | -          |
| 4RMXA_413_422   | 10     | -            | -          | 1YSQA_87_101    | 15     | 10           | 5          |
| 4W8HA_194_203   | 10     | 4            | 2          | 1ZUOA_333_347   | 15     | 2            | 1          |
| 5J41A_140_149   | 10     | 22           | 13         | 2Q0LA_43_57     | 15     | 1            | 1          |
| 5JRHA_331_340   | 10     | 5            | 3          | 2RB9A_189_203   | 15     | 12           | 8          |
| 1KGDG_854_864   | 11     | 9            | 5          | 2VNGA_125_139   | 15     | 17           | 8          |
| 1Y9LA_87_97     | 11     | 1            | 1          | 2WW8A_501_515   | 15     | -            | -          |
| 2D5BA_9_19      | 11     | 15           | 6          | 3IT3A_60_74     | 15     | 10           | 7          |
| 2Y78A_17_27     | 11     | 36           | 29         | 4A4AA_818_832   | 15     | 12           | 4          |
| 3L5LA_65_75     | 11     | 29           | 23         | 4ANOA_123_137   | 15     | 3            | 3          |
| 3PMEA_1048_1058 | 11     | 7            | 1          | 4E9XA_1073_1087 | 15     | 21           | 16         |
| 3VKWA_891_901   | 11     | 6            | 4          | 4LZKA_32_46     | 15     | 3            | 3          |
| 4DV8A_488_498   | 11     | 2            | 0          | 1IUJA_75_90     | 16     | 11           | 8          |
| 4ITBA_102_112   | 11     | 9            | 7          | 1NFPA_49_64     | 16     | -            | -          |
| 4LGYA_831_841   | 11     | 1            | 1          | 2BGKA_99_114    | 16     | 30           | 22         |
| 4UZGA_426_436   | 11     | 10           | 7          | 2FVYA_274_289   | 16     | 1            | 1          |
| 4YFUA_620_630   | 11     | 16           | 11         | 2Q88A_192_207   | 16     | 59           | 46         |
| 4ZMYA_40_50     | 11     | 12           | 5          | 3G06A_652_667   | 16     | 1            | 1          |
| 5CENA_253_263   | 11     | 49           | 15         | 3ZX4A_219_234   | 16     | 15           | 9          |
| 5IOJA_406_416   | 11     | 10           | 7          | 4E8DA_330_345   | 16     | 1            | 0          |
| 1DJ7A_51_62     | 12     | 25           | 9          | 4LM8A_125_140   | 16     | 11           | 5          |
| 1JS1X_273_284   | 12     | 24           | 11         | 4U9HL_231_246   | 16     | 1            | 1          |
| 1OO0B_104_115   | 12     | 25           | 19         | 5DAWA_162_177   | 16     | 84           | 60         |
| 1UF5A_66_77     | 12     | 5            | 1          | 5KKQA_375_390   | 16     | 22           | 16         |
| 1W2WB_367_378   | 12     | 10           | 6          | 5LX8A_538_553   | 16     | 8            | 6          |
| 2C4EA_278_289   | 12     | 14           | 13         | 5M6QA_55_70     | 16     | -            | -          |
| 2ICGA_16_27     | 12     | 4            | 3          | 5XNHA_116_131   | 16     | -            | -          |
| 3F58A_227_238   | 12     | -            | -          | 1GQIA_550_566   | 17     | 4            | 3          |
| 3NIOA_45_56     | 12     | 10           | 9          | 1U7BA_118_134   | 17     | 8            | 7          |
| 3UUEA_57_68     | 12     | 7            | 3          | 2DSKA_626_642   | 17     | 12           | 9          |
| 4B6IA_85_96     | 12     | 2            | 1          | 2I5VO_248_264   | 17     | 18           | 15         |
| 5AVDA_224_235   | 12     | 11           | 8          | 2P9BA_386_402   | 17     | 62           | 37         |
| 5C9LA_103_114   | 12     | 31           | 11         | 3DCMX_11_27     | 17     | 15           | 7          |
| 5HWAA_212_223   | 12     | -            | -          | 3F2VA_85_101    | 17     | 19           | 13         |
| 5MZWB_95_106    | 12     | 34           | 25         | 3VENA_464_480   | 17     | 4            | 3          |
| 2CB1A_200_212   | 13     | 20           | 14         | 3VMNA_326_342   | 17     | -            | -          |
| 2IXMA_59_71     | 13     | 1            | 1          | 4AGKA_143_159   | 17     | 1            | 1          |
| 3AYRA_109_121   | 13     | 23           | 12         | 4HDRB_125_141   | 17     | 6            | 4          |
| 3EF6A_53_65     | 13     | -            | -          | 4R12A_491_507   | 17     | -            | -          |
| 3PT5A_258_270   | 13     | -            | -          | 5B0NA_124_140   | 17     | 50           | 39         |
| 3QY9A_165_177   | 13     | -            | -          | 5CDKA_105_121   | 17     | 13           | 9          |
| 3TN4A_229_241   | 13     | 16           | 9          | 5LSVA_26_42     | 17     | 3            | 1          |
| 4B2ZA_307_319   | 13     | 1            | 1          | 1GAIA_254_271   | 18     | 4            | 2          |
| 4ETNA_111_123   | 13     | 22           | 12         | 1HQ0A_741_758   | 18     | -            | -          |
| 4EUUA_189_201   | 13     | 3            | 0          | 1QQFA_1058_1075 | 18     | 15           | 14         |
| 4P8NA_370_382   | 13     | 1            | 1          | 1UM0A_211_228   | 18     | 3            | 1          |
| 4QV2A_536_548   | 13     | 7            | 2          | 2GGSA_111_128   | 18     | 4            | 3          |
| 5E56A_53_65     | 13     | 12           | 5          | 2XZIA_39_56     | 18     | 3            | 3          |
| 5IRCA_1276_1288 | 13     | 22           | 13         | 3UV0A_26_43     | 18     | 43           | 21         |
| 5KF9A_62_74     | 13     | 1            | 0          | 3VSA_6_23       | 18     | 9            | 8          |
| 2HC9A_258_271   | 14     | 29           | 7          | 4AK2A_555_572   | 18     | -            | -          |
| 2OZLA_55_68     | 14     | 36           | 18         | 4B4HA_526_543   | 18     | 8            | 7          |
| 2VHKA_177_190   | 14     | 5            | 0          | 4QO5A_294_311   | 18     | 1            | 1          |
| 2YIMA_113_126   | 14     | 16           | 6          | 4R9OA_85_102    | 18     | 20           | 11         |
| 2ZFNH_121_134   | 14     | 1            | 0          | 5A7MA_584_601   | 18     | -            | -          |
| 3ACHA_69_82     | 14     | 2            | 0          | 5GN2A_204_221   | 18     | 1            | 1          |
| 3QFTA_354_367   | 14     | 1            | 1          | 5H3ZA_1072_1089 | 18     | 12           | 3          |
| 3QLIA_262_275   | 14     | 27           | 18         |                 |        |              |            |

✗ = Omitted due to having <2 predicted contacts

● = Omitted due to having <2 predicted contacts remaining after ignoring those which were never satisfied (Sphinx only)

## 2. General target set results

### (b) $N_{\text{eff}}$ vs accuracy of predicted contacts

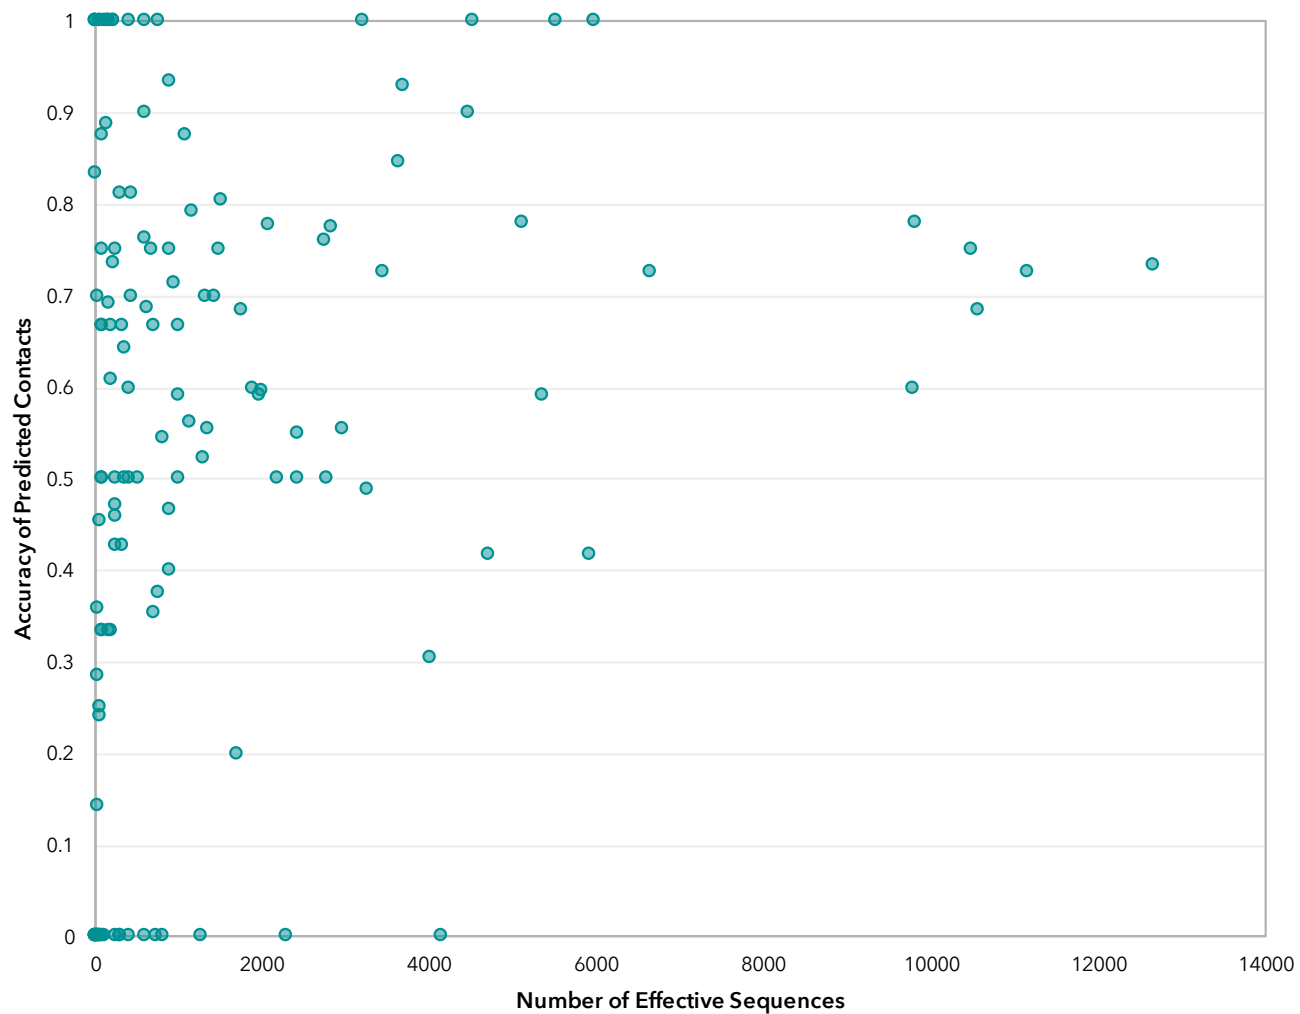

*The number of effective sequences in the alignment ( $N_{\text{eff}}$ ) used to predict contacts by MetaPSICOV, vs. the accuracy of the predicted contacts.  $N_{\text{eff}}$  values are taken directly from the MetaPSICOV output.*

## 2. General target set results

### (c) Alignment gaps vs. accuracy of predicted contacts/loop structure prediction

To investigate the effect of the alignments in more detail, we looked at each position in the loop and calculated the percentage of sequences in the alignment that feature a gap at that location. For each target loop, we averaged the values for each position to give a single value indicating the prevalence of gaps in the alignment for that target. Plotting this value against the accuracy of contact prediction and the improvement in the accuracy of structure prediction (Sphinx results) shows no clear relationship (see below). Targets with high gap occurrence may have a near-perfect set of predicted contacts, leading to improved structure prediction, while the contacts for some targets with few gaps in the alignment are predicted poorly and hence the accuracy of structure prediction is made worse.

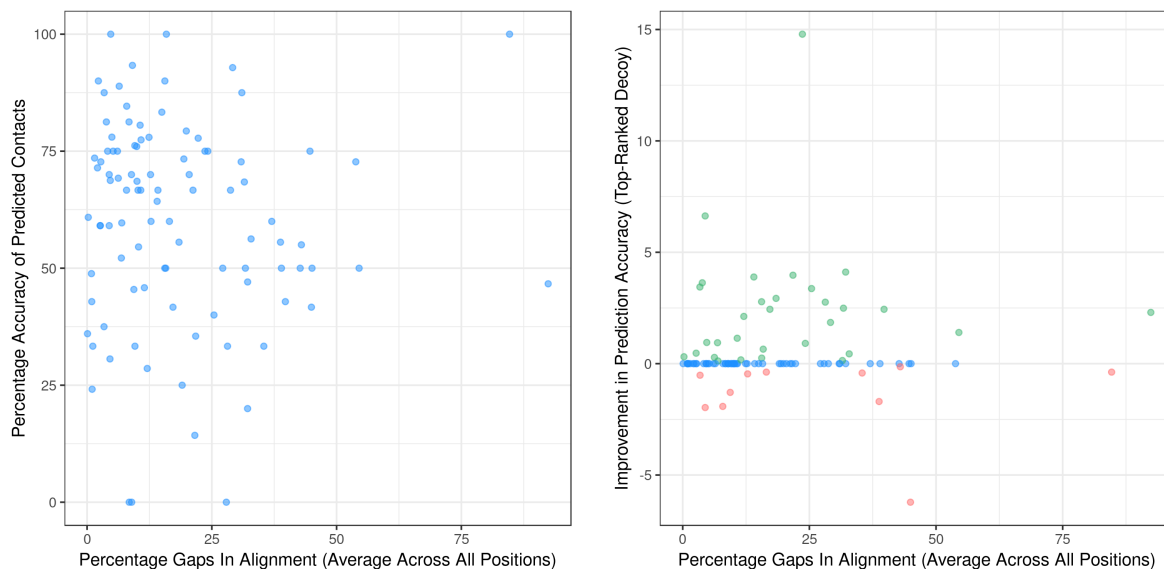

Average gap percentage vs. accuracy of predicted contacts (left) and improvement in the accuracy of loop structure prediction after incorporation of contact information (right). In the right-hand plot, the 'improvement' in accuracy of structure prediction refers to the RMSD of the top-ranked decoy. Targets whose models were improved by contact information are coloured green, those that were not affected are in blue, and those that were made worse are in red.

## 2. General target set results

### (d) Full Sphinx results

Best = RMSD of the best (i.e. closest to native) decoy generated

Best of Top 500 = RMSD of the best decoy remaining in the set after filtering using Sphinx's scoring function

Top Ranked = RMSD of the decoy predicted to be the best by the SOAP-Loop scoring function

Best of Top 5 = RMSD of the best decoy in the top five as ranked by SOAP-Loop

All RMSDs are global backbone RMSDs.

| Target          | Length | Best | Best of Top 500 |             | Top Ranked  |             | Best of Top 5 |             |
|-----------------|--------|------|-----------------|-------------|-------------|-------------|---------------|-------------|
|                 |        |      | Normal          | Contacts    | Normal      | Contacts    | Normal        | Contacts    |
| 1F74A_105_114   | 10     | 0.33 | <b>0.34</b>     | 0.39        | 0.87        | <b>0.40</b> | 0.51          | <b>0.40</b> |
| 1NU4A_73_82     | 10     | 0.31 | 0.44            | 0.44        | 0.63        | 0.63        | <b>0.62</b>   | 0.63        |
| 1Y0PA_168_177   | 10     | 0.36 | 0.36            | 0.36        | 0.42        | 0.42        | 0.38          | 0.38        |
| 1ZJCA_18_27     | 10     | 1.59 | 1.84            | 1.84        | 5.58        | <b>1.95</b> | 5.07          | <b>1.95</b> |
| 2IVFA_677_686   | 10     | 0.41 | 0.41            | 0.41        | 0.57        | 0.57        | 0.44          | 0.44        |
| 2PN1A_95_104    | 10     | 0.88 | 0.88            | 0.88        | 0.88        | 0.88        | 0.88          | 0.88        |
| 3JQYA_109_118   | 10     | 0.54 | 0.54            | 0.54        | 0.66        | 0.66        | 0.54          | 0.54        |
| 3PHXB_127_136   | 10     | 0.34 | 0.36            | <b>0.34</b> | 0.45        | 0.45        | 0.45          | 0.45        |
| 4FFJA_164_173   | 10     | 1.56 | 1.90            | <b>1.83</b> | 7.41        | <b>3.52</b> | 6.78          | <b>3.05</b> |
| 4MGQA_173_182   | 10     | 1.28 | 1.40            | <b>1.28</b> | 2.16        | 2.16        | 2.03          | 2.03        |
| 4N68A_955_964   | 10     | 0.43 | 0.43            | 0.43        | 0.57        | 0.57        | 0.43          | 0.43        |
| 4W8HA_194_203   | 10     | 1.05 | 1.66            | <b>1.05</b> | 4.86        | <b>3.46</b> | 3.46          | 3.46        |
| 5J41A_140_149   | 10     | 0.26 | 0.26            | 0.26        | 6.89        | <b>0.26</b> | 6.89          | <b>0.26</b> |
| 5JRHA_331_340   | 10     | 0.26 | <b>0.26</b>     | 0.86        | <b>0.78</b> | 1.16        | <b>0.26</b>   | 1.15        |
| 1KGDA_854_864   | 11     | 1.47 | <b>1.63</b>     | 2.13        | <b>4.05</b> | 5.75        | 3.01          | 3.01        |
| 2D5BA_9_19      | 11     | 1.51 | 1.87            | <b>1.52</b> | 5.27        | <b>1.90</b> | 4.59          | <b>1.90</b> |
| 2Y78A_17_27     | 11     | 0.22 | 0.22            | 0.22        | 0.36        | 0.36        | 0.22          | 0.22        |
| 3L5LA_65_75     | 11     | 0.16 | 0.16            | 0.16        | 0.20        | 0.20        | 0.20          | 0.20        |
| 3PMEA_1048_1058 | 11     | 0.46 | 0.46            | 0.46        | 0.71        | 0.71        | 0.54          | 0.54        |
| 3VKWA_891_901   | 11     | 1.54 | 1.57            | 1.57        | 4.09        | 4.09        | <b>2.40</b>   | 2.43        |
| 4DV8A_488_498   | 11     | 0.47 | 0.47            | 0.47        | 0.58        | 0.58        | 0.54          | 0.54        |
| 4ITBA_102_112   | 11     | 0.18 | 0.18            | 0.18        | 0.36        | 0.36        | 0.23          | 0.23        |
| 4UZGA_426_436   | 11     | 1.08 | 2.23            | <b>2.05</b> | <b>3.93</b> | 5.90        | 3.93          | <b>2.55</b> |
| 4YFUA_620_630   | 11     | 0.19 | 0.23            | <b>0.19</b> | 0.23        | 0.23        | 0.23          | 0.23        |
| 4ZMYA_40_50     | 11     | 0.19 | <b>0.20</b>     | 3.50        | <b>0.39</b> | 6.61        | <b>0.38</b>   | 5.89        |
| 5CENA_253_263   | 11     | 1.74 | 1.76            | <b>1.74</b> | 3.55        | 3.55        | 3.14          | 3.14        |
| 5IOJA_406_416   | 11     | 1.68 | <b>1.68</b>     | 1.89        | 2.91        | 2.91        | 2.19          | 2.19        |
| 1DJ7A_51_62     | 12     | 0.30 | 0.30            | 0.30        | 0.49        | 0.49        | 0.30          | 0.30        |
| 1JS1X_273_284   | 12     | 0.27 | 0.40            | <b>0.29</b> | 0.46        | <b>0.29</b> | 0.40          | <b>0.29</b> |
| 1OO0B_104_115   | 12     | 0.53 | 0.53            | 0.53        | 0.89        | 0.89        | 0.58          | 0.58        |
| 1UF5A_66_77     | 12     | 1.09 | 3.41            | <b>1.46</b> | 5.57        | <b>1.46</b> | 3.41          | <b>1.46</b> |
| 1W2WB_367_378   | 12     | 0.64 | 0.64            | 0.64        | <b>0.64</b> | 1.10        | <b>0.64</b>   | 1.03        |
| 2C4EA_278_289   | 12     | 1.70 | 2.86            | <b>2.17</b> | 8.61        | <b>6.76</b> | 6.76          | <b>4.83</b> |
| 2ICGA_16_27     | 12     | 1.69 | <b>2.25</b>     | 2.54        | 6.33        | <b>6.33</b> | 4.81          | <b>3.53</b> |
| 3NIOA_45_56     | 12     | 0.87 | 0.87            | 0.87        | 5.39        | <b>5.14</b> | 4.65          | <b>2.11</b> |
| 3UUEA_57_68     | 12     | 0.68 | 0.85            | <b>0.68</b> | 3.26        | <b>0.82</b> | 0.85          | <b>0.68</b> |
| 5AVDA_224_235   | 12     | 0.33 | 0.33            | 0.33        | 0.67        | 0.67        | 0.41          | 0.41        |
| 5C9LA_103_114   | 12     | 1.85 | 3.18            | <b>2.84</b> | 8.71        | <b>4.74</b> | 4.14          | <b>3.45</b> |
| 5MZWB_95_106    | 12     | 1.14 | 1.14            | 1.14        | 2.64        | 2.64        | 1.62          | 1.62        |
| 2CB1A_200_212   | 13     | 0.51 | 0.51            | 0.51        | 0.90        | 0.90        | 0.56          | 0.56        |
| 3AYRA_109_121   | 13     | 0.94 | 3.60            | <b>2.83</b> | 6.20        | <b>5.26</b> | 6.20          | <b>4.89</b> |
| 3TN4A_229_241   | 13     | 0.49 | <b>0.59</b>     | 0.73        | 3.07        | <b>2.63</b> | <b>0.59</b>   | 2.63        |
| 4ETNA_111_123   | 13     | 0.82 | 0.91            | <b>0.82</b> | 0.98        | 0.98        | 0.95          | 0.95        |
| 4EUUA_189_201   | 13     | 0.59 | 0.59            | 0.59        | 1.81        | 1.81        | 0.59          | 0.59        |
| 4QV2A_536_548   | 13     | 1.92 | 2.46            | <b>2.31</b> | 5.99        | <b>3.87</b> | 3.72          | <b>2.46</b> |
| 5E56A_53_65     | 13     | 1.92 | 2.85            | <b>2.56</b> | 5.62        | <b>3.18</b> | <b>2.90</b>   | 3.18        |
| 5IRCA_1276_1288 | 13     | 0.42 | 0.42            | 0.42        | 0.51        | 0.51        | 0.47          | 0.47        |
| 2HC9A_258_271   | 14     | 2.92 | 3.79            | 3.79        | 6.43        | 6.43        | 6.10          | <b>5.46</b> |
| 2OZLA_55_68     | 14     | 0.29 | 0.29            | 0.29        | 0.33        | 0.33        | 0.33          | 0.33        |
| 2VHKA_177_190   | 14     | 1.62 | <b>3.33</b>     | 3.87        | 7.58        | 7.58        | 6.37          | 6.37        |
| 2YIMA_113_126   | 14     | 2.24 | 2.69            | <b>2.30</b> | 8.15        | <b>4.71</b> | 3.91          | <b>2.69</b> |
| 3QLIA_262_275   | 14     | 0.22 | 0.22            | 0.22        | 0.33        | 0.33        | 0.33          | 0.33        |
| 3UN7A_461_474   | 14     | 1.39 | 1.81            | <b>1.73</b> | 7.00        | <b>4.07</b> | 1.87          | 1.87        |
| 4AUKA_27_40     | 14     | 1.62 | 1.62            | 1.62        | 1.78        | 1.78        | 1.77          | 1.77        |
| 4MDYA_204_217   | 14     | 1.49 | 2.61            | 2.61        | 9.51        | <b>6.73</b> | 5.55          | <b>5.37</b> |
| 4P5PA_183_196   | 14     | 1.68 | 3.39            | <b>1.68</b> | 5.94        | 5.94        | 5.80          | <b>4.78</b> |
| 1APYA_49_63     | 15     | 0.97 | 0.97            | 0.97        | 1.42        | <b>1.11</b> | 1.10          | <b>1.00</b> |
| 1KQPA_205_219   | 15     | 2.38 | 8.34            | <b>2.38</b> | 10.14       | <b>7.65</b> | 10.14         | <b>4.02</b> |
| 1YSQA_87_101    | 15     | 2.87 | 2.95            | 2.95        | 5.48        | 5.48        | 5.48          | <b>4.24</b> |
| 1ZUOA_333_347   | 15     | 1.92 | 1.92            | 1.92        | 1.97        | 1.97        | 1.92          | 1.92        |
| 2RB9A_189_203   | 15     | 2.29 | 3.13            | <b>2.67</b> | 4.96        | <b>3.82</b> | 4.08          | <b>3.61</b> |

2. General target set results  
(d) Full Sphinx results (cont.)

| Target          | Length | Best | Best of Top 500 |             | Top Ranked   |              | Best of Top 5 |             |
|-----------------|--------|------|-----------------|-------------|--------------|--------------|---------------|-------------|
|                 |        |      | Normal          | Contacts    | Normal       | Contacts     | Normal        | Contacts    |
| 2VNGA_125_139   | 15     | 2.45 | 2.92            | 2.92        | 4.03         | 4.03         | 3.65          | 3.65        |
| 3IT3A_60_74     | 15     | 1.14 | 1.30            | <b>1.14</b> | 1.30         | 1.30         | 1.30          | 1.30        |
| 4A4AA_818_832   | 15     | 0.60 | 0.60            | 0.60        | 0.86         | 0.86         | 0.60          | 0.60        |
| 4ANOA_123_137   | 15     | 3.01 | 4.38            | <b>3.89</b> | 6.46         | <b>5.51</b>  | 5.67          | <b>5.51</b> |
| 4E9XA_1073_1087 | 15     | 0.40 | 0.40            | 0.40        | 0.47         | 0.47         | 0.40          | 0.40        |
| 4LZKA_32_46     | 15     | 2.50 | 3.73            | <b>3.27</b> | 12.21        | <b>11.56</b> | <b>7.67</b>   | 8.85        |
| 1IUJA_75_90     | 16     | 2.94 | 3.13            | 3.13        | 3.91         | 3.91         | 3.91          | <b>3.13</b> |
| 2BGKA_99_114    | 16     | 2.05 | 2.05            | 2.05        | 3.57         | 3.57         | 3.57          | 3.57        |
| 2Q88A_192_207   | 16     | 1.94 | 1.94            | 1.94        | 1.94         | 1.94         | 1.94          | 1.94        |
| 3ZX4A_219_234   | 16     | 2.53 | 2.68            | 2.68        | 10.16        | 10.16        | 4.90          | 4.90        |
| 4LM8A_125_140   | 16     | 2.20 | <b>2.61</b>     | 2.85        | <b>4.82</b>  | 6.11         | <b>4.82</b>   | 5.35        |
| 5DAWA_162_177   | 16     | 1.13 | 1.13            | 1.13        | 1.13         | 1.13         | 1.13          | 1.13        |
| 5KKQA_375_390   | 16     | 0.72 | 0.72            | 0.72        | 0.72         | 0.72         | 0.72          | 0.72        |
| 5LX8A_538_553   | 16     | 2.19 | <b>2.23</b>     | 2.83        | 6.51         | <b>5.60</b>  | 4.93          | <b>3.83</b> |
| 1GQIA_550_566   | 17     | 0.15 | 0.15            | 0.15        | 0.29         | 0.29         | 0.15          | 0.15        |
| 1U7BA_118_134   | 17     | 0.90 | <b>0.90</b>     | 1.45        | <b>1.50</b>  | 2.02         | <b>1.20</b>   | 1.76        |
| 2DSKA_626_642   | 17     | 0.19 | 0.19            | 0.19        | 0.21         | 0.21         | 0.19          | 0.19        |
| 2I5VO_248_264   | 17     | 0.24 | 0.24            | 0.24        | 0.41         | 0.41         | 0.24          | 0.24        |
| 2P9BA_386_402   | 17     | 0.28 | <b>0.28</b>     | 0.30        | 0.42         | <b>0.30</b>  | <b>0.29</b>   | 0.30        |
| 3DCMX_11_27     | 17     | 2.84 | 5.06            | <b>4.04</b> | 13.60        | <b>11.30</b> | 10.41         | <b>7.76</b> |
| 3F2VA_85_101    | 17     | 0.79 | 0.79            | 0.79        | 1.36         | <b>1.22</b>  | <b>0.93</b>   | 1.04        |
| 3VENA_464_480   | 17     | 0.27 | 0.27            | 0.27        | 0.28         | 0.28         | 0.28          | 0.28        |
| 4HDRB_125_141   | 17     | 3.43 | 6.41            | <b>5.02</b> | <b>11.30</b> | 13.22        | 10.67         | <b>9.45</b> |
| 5B0NA_124_140   | 17     | 0.63 | 0.63            | 0.63        | 0.71         | 0.71         | 0.67          | 0.67        |
| 5CDKA_105_121   | 17     | 1.38 | 2.00            | <b>1.54</b> | 2.08         | <b>1.80</b>  | 2.00          | <b>1.54</b> |
| 5LSVA_26_42     | 17     | 2.79 | <b>4.46</b>     | 4.59        | <b>9.96</b>  | 10.38        | 7.11          | <b>5.83</b> |
| 1GAIA_254_271   | 18     | 0.63 | 0.63            | 0.63        | 1.22         | 1.22         | 0.63          | 0.63        |
| 1QQFA_1058_1075 | 18     | 0.21 | 0.28            | <b>0.22</b> | 0.49         | 0.49         | <b>0.35</b>   | 0.41        |
| 1UM0A_211_228   | 18     | 3.17 | 3.85            | <b>3.17</b> | 7.41         | <b>4.65</b>  | 5.94          | <b>4.65</b> |
| 2GGSA_111_128   | 18     | 0.79 | 5.35            | <b>1.38</b> | 16.17        | <b>1.38</b>  | 5.35          | <b>1.38</b> |
| 2XZIA_39_56     | 18     | 0.45 | 0.48            | <b>0.45</b> | <b>0.48</b>  | 0.86         | 0.48          | <b>0.45</b> |
| 3UV0A_26_43     | 18     | 3.92 | 6.61            | <b>4.59</b> | 13.89        | 13.89        | 10.65         | 10.65       |
| 3VSVA_6_23      | 18     | 2.95 | 7.06            | <b>5.92</b> | 11.37        | 11.37        | <b>9.15</b>   | 10.37       |
| 4B4HA_526_543   | 18     | 0.27 | 0.27            | 0.27        | 0.70         | 0.70         | 0.45          | 0.45        |
| 4R9OA_85_102    | 18     | 0.50 | 0.53            | <b>0.50</b> | <b>0.53</b>  | 0.67         | 0.53          | 0.53        |
| 5H3ZA_1072_1089 | 18     | 4.18 | 5.14            | <b>4.35</b> | 8.57         | 8.57         | 7.78          | <b>7.06</b> |

Average results:

| Length | No. Targets | Best | Best of Top 500 |             | Top Ranked  |             | Best of Top 5 |             |
|--------|-------------|------|-----------------|-------------|-------------|-------------|---------------|-------------|
|        |             |      | Normal          | Contacts    | Normal      | Contacts    | Normal        | Contacts    |
| 10     | 14          | 0.69 | 0.79            | <b>0.78</b> | 2.34        | <b>1.22</b> | 2.05          | <b>1.15</b> |
| 11     | 13          | 0.84 | <b>0.97</b>     | 1.24        | <b>2.05</b> | 2.55        | <b>1.66</b>   | 1.77        |
| 12     | 12          | 0.93 | 1.40            | <b>1.15</b> | 3.64        | <b>2.61</b> | 2.38          | <b>1.69</b> |
| 13     | 8           | 0.95 | 1.49            | <b>1.35</b> | 3.13        | <b>2.39</b> | 2.00          | <b>1.97</b> |
| 14     | 9           | 1.49 | 2.19            | <b>2.01</b> | 5.23        | <b>4.21</b> | 3.56          | <b>3.22</b> |
| 15     | 11          | 1.87 | 2.79            | <b>2.10</b> | 4.48        | <b>3.98</b> | 3.82          | <b>3.19</b> |
| 16     | 8           | 1.96 | <b>2.06</b>     | 2.17        | <b>4.09</b> | 4.14        | 3.24          | <b>3.07</b> |
| 17     | 12          | 1.16 | 1.78            | <b>1.60</b> | <b>3.51</b> | 3.51        | 2.85          | <b>2.43</b> |
| 18     | 10          | 1.71 | 3.02            | <b>2.15</b> | 6.08        | <b>4.38</b> | 4.13          | <b>3.66</b> |
| ALL    | 97          | 1.24 | 1.76            | <b>1.55</b> | 3.71        | <b>3.11</b> | 2.79          | <b>2.37</b> |

## 2. General target set results

### (e) Accuracy of predicted contacts vs. improvement in structure prediction

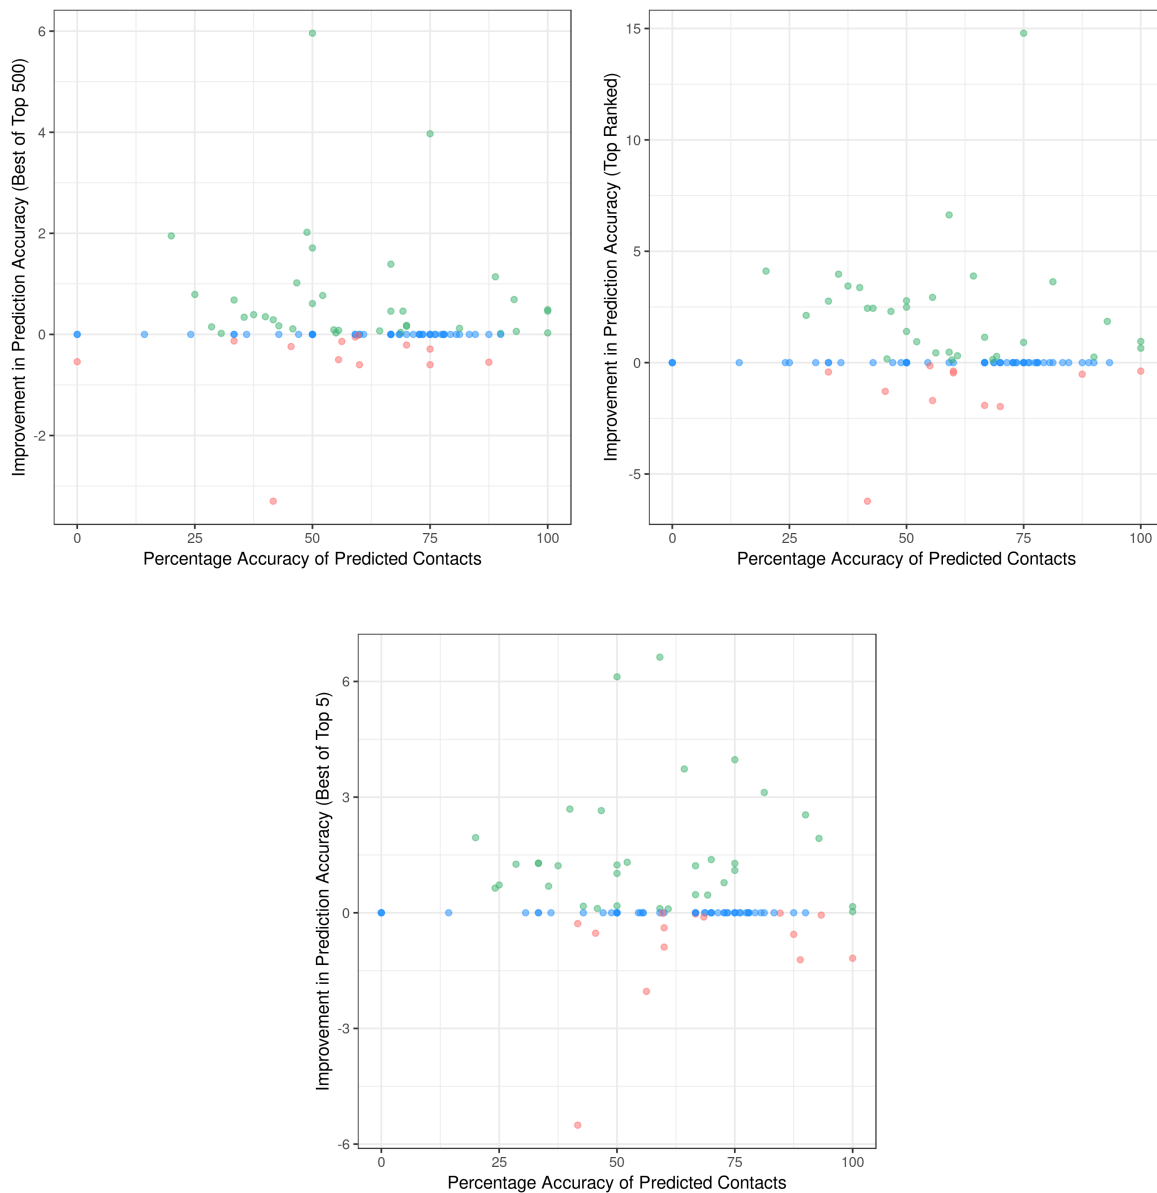

Plots of the accuracy of predicted contacts for each target vs. the improvement observed in the accuracy of structure prediction using Sphinx. The colour of each point relates to whether the accuracy of structure prediction was improved (green), remained the same (blue) or was made worse (red) when contact information was used. There is no clear relationship - improvements in structure prediction are still observed for targets for which contacts were predicted poorly.



## 2. General target set results

### (f) Inclusion of trivial contacts

MetaPSICOV does not predict trivial contacts (those between residues fewer than 5 residues apart in the protein sequence). To test whether contacts between residues that are close in sequence ('trivial' contacts) have an effect on the accuracy of loop structure prediction, we used the method CCMpred, which does allow the user to specify a minimum residue separation. Using CCMpred resulted in predicted contacts for 42 of the 135 targets of the test set - this is far fewer than MetaPSICOV, which gave contacts for 97. Of these, 30 targets had both trivial and non-trivial contacts. The results achieved for this set using Sphinx, and using the contacts predicted by CCMpred, are given in the table below:

|                         | Best Top 500 | Top Ranked | Best Top 5 |
|-------------------------|--------------|------------|------------|
| <b>No Contacts</b>      | 1.38 Å       | 2.97 Å     | 2.16 Å     |
| <b>Non-Trivial Only</b> | 1.12 Å       | 2.16 Å     | 1.63 Å     |
| <b>All Contacts</b>     | 1.17 Å       | 2.02 Å     | 1.69 Å     |

Using all predicted contacts (both trivial and non-trivial) produces very similar results to using non-trivial contacts only.

## 2. General target set results

### (g) Location of predicted contact residues

We have examined whether the accuracy of predicted contacts is different depending on the location of the contacting residues. Comparing predicted contacts between two target loop residues to those between one loop residue and one residue located elsewhere in the protein showed no difference in accuracy (62.3% and 62.0% respectively).

For those predicted contacts featuring only one target loop residue, we investigated whether the accuracy differed for contacts where the loop residue was located in the middle, the beginning ('N-end') or end ('C-end') of the loop, according to the table below.

| Loop Length | Number of Residues |        |       |
|-------------|--------------------|--------|-------|
|             | N-end              | Middle | C-end |
| 10          | 3                  | 4      | 3     |
| 11          | 4                  | 3      | 4     |
| 12          | 4                  | 4      | 4     |
| 13          | 4                  | 5      | 4     |
| 14          | 5                  | 4      | 5     |
| 15          | 5                  | 5      | 5     |
| 16          | 5                  | 6      | 5     |
| 17          | 6                  | 5      | 6     |
| 18          | 6                  | 6      | 6     |

We found slight differences in the accuracy of predicted contacts: 59.4%, 64.4% and 62.4% for the middle, N-end and C-end contacts, respectively. Re-running our ranking method omitting each type of contact revealed little difference in Sphinx prediction accuracy (see table below). We therefore cannot conclude that contacts involving residues from a particular loop region are more/less useful.

|                           | Best Top 500 | Top Ranked | Best Top 5 |
|---------------------------|--------------|------------|------------|
| <b>Excluding 'middle'</b> | 1.54 Å       | 3.06 Å     | 2.35 Å     |
| <b>Excluding 'N-end'</b>  | 1.51 Å       | 3.15 Å     | 2.39 Å     |
| <b>Excluding 'C-end'</b>  | 1.54 Å       | 2.99 Å     | 2.39 Å     |

## 2. General target set results

### (h) Full MODELLER results

Best = RMSD of the best (i.e. closest to native) decoy generated

Top Ranked = RMSD of the decoy predicted to be the best by the SOAP-Loop scoring function

Best of Top 5 = RMSD of the best decoy in the top five as ranked by SOAP-Loop

All RMSDs are global backbone RMSDs.

| Target          | Length | Best        |             | Top Ranked  |             | Best of Top 5 |             |
|-----------------|--------|-------------|-------------|-------------|-------------|---------------|-------------|
|                 |        | Normal      | Contacts    | Normal      | Contacts    | Normal        | Contacts    |
| 1F74A_105_114   | 10     | <b>1.00</b> | 1.01        | <b>2.61</b> | 3.31        | 2.07          | <b>1.30</b> |
| 1NU4A_73_82     | 10     | 0.78        | <b>0.77</b> | <b>0.79</b> | 0.82        | <b>0.79</b>   | 0.82        |
| 1Y0PA_168_177   | 10     | 0.76        | 0.76        | 0.93        | <b>0.85</b> | 0.90          | <b>0.84</b> |
| 1ZJCA_18_27     | 10     | 0.94        | <b>0.37</b> | 1.51        | <b>0.37</b> | 0.94          | <b>0.37</b> |
| 2IVFA_677_686   | 10     | 1.72        | <b>0.80</b> | <b>2.12</b> | 2.29        | 2.12          | <b>1.11</b> |
| 2PN1A_95_104    | 10     | 0.47        | <b>0.45</b> | <b>0.48</b> | 0.50        | 0.48          | <b>0.47</b> |
| 3JQYA_109_118   | 10     | <b>0.56</b> | 0.62        | <b>0.56</b> | 0.62        | <b>0.56</b>   | 0.62        |
| 3PHXB_127_136   | 10     | 0.60        | <b>0.58</b> | 0.60        | <b>0.58</b> | 0.60          | <b>0.58</b> |
| 4FFJA_164_173   | 10     | 1.73        | <b>1.57</b> | 8.19        | <b>3.22</b> | <b>1.83</b>   | 2.47        |
| 4MGQA_173_182   | 10     | 0.56        | <b>0.41</b> | 0.56        | <b>0.53</b> | 0.56          | <b>0.41</b> |
| 4N68A_955_964   | 10     | <b>0.49</b> | 0.50        | <b>0.53</b> | 0.54        | <b>0.49</b>   | 0.50        |
| 4W8HA_194_203   | 10     | 1.64        | <b>1.19</b> | 1.64        | <b>1.19</b> | 1.64          | <b>1.19</b> |
| 5J41A_140_149   | 10     | 1.02        | <b>0.83</b> | 1.25        | <b>1.21</b> | <b>1.02</b>   | 1.03        |
| 5JRHA_331_340   | 10     | <b>1.67</b> | 1.75        | 3.93        | <b>1.89</b> | <b>1.71</b>   | 1.89        |
| 1KGDA_854_864   | 11     | <b>1.82</b> | 1.97        | 6.15        | <b>2.47</b> | 4.56          | <b>2.41</b> |
| 2D5BA_9_19      | 11     | <b>1.08</b> | 1.19        | <b>1.32</b> | 4.99        | <b>1.16</b>   | 1.25        |
| 2Y78A_17_27     | 11     | 2.54        | <b>0.77</b> | 3.08        | <b>0.82</b> | 3.06          | <b>0.80</b> |
| 3L5LA_65_75     | 11     | 0.55        | <b>0.47</b> | 0.69        | <b>0.47</b> | 0.55          | <b>0.47</b> |
| 3PMEA_1048_1058 | 11     | <b>1.59</b> | 1.88        | <b>2.48</b> | 4.20        | <b>2.48</b>   | 2.53        |
| 3VKWA_891_901   | 11     | <b>1.63</b> | 1.64        | <b>1.99</b> | 3.13        | <b>1.64</b>   | 2.42        |
| 4DV8A_488_498   | 11     | <b>1.11</b> | 1.63        | <b>1.11</b> | 4.32        | <b>1.11</b>   | 2.78        |
| 4ITBA_102_112   | 11     | <b>0.42</b> | 0.48        | <b>0.60</b> | 3.06        | 0.60          | <b>0.48</b> |
| 4UZGA_426_436   | 11     | 0.76        | <b>0.75</b> | <b>0.76</b> | 1.91        | 0.76          | <b>0.75</b> |
| 4YFUA_620_630   | 11     | 2.61        | <b>1.14</b> | 4.04        | <b>1.39</b> | 3.60          | <b>1.14</b> |
| 4ZMYA_40_50     | 11     | 3.98        | <b>2.10</b> | <b>5.00</b> | 5.61        | <b>5.00</b>   | 5.54        |
| 5CENA_253_263   | 11     | <b>1.29</b> | 2.03        | 6.52        | <b>5.14</b> | 6.15          | <b>2.59</b> |
| 5IOJA_406_416   | 11     | <b>1.13</b> | 1.14        | 2.53        | <b>1.36</b> | 2.31          | <b>1.36</b> |
| 1DJ7A_51_62     | 12     | 1.25        | <b>1.20</b> | 1.64        | <b>1.35</b> | 1.41          | <b>1.35</b> |
| 1JS1X_273_284   | 12     | 2.05        | <b>1.73</b> | 4.09        | <b>2.04</b> | 2.48          | <b>2.04</b> |
| 1OO0B_104_115   | 12     | 2.35        | <b>1.79</b> | 11.40       | <b>8.80</b> | 5.32          | <b>3.70</b> |
| 1UF5A_66_77     | 12     | 1.62        | <b>1.59</b> | 4.55        | <b>1.59</b> | 1.62          | <b>1.59</b> |
| 1W2WB_367_378   | 12     | 1.44        | <b>1.30</b> | <b>3.61</b> | 5.89        | <b>1.94</b>   | 2.34        |
| 2C4EA_278_289   | 12     | 2.17        | <b>1.37</b> | 3.65        | <b>3.36</b> | 3.65          | <b>1.60</b> |
| 2ICGA_16_27     | 12     | 1.26        | <b>0.84</b> | 1.26        | 1.26        | 1.26          | 1.26        |
| 3NIOA_45_56     | 12     | 1.58        | <b>1.52</b> | 3.46        | <b>2.48</b> | <b>1.91</b>   | 2.15        |
| 3UUEA_57_68     | 12     | 1.53        | <b>1.46</b> | <b>2.52</b> | 3.11        | 1.53          | <b>1.46</b> |
| 4B6IA_85_96     | 12     | 2.16        | <b>1.72</b> | 8.19        | <b>7.20</b> | <b>4.46</b>   | 4.49        |
| 5AVDA_224_235   | 12     | 3.66        | <b>2.01</b> | 4.83        | <b>2.91</b> | 4.83          | <b>2.91</b> |
| 5C9LA_103_114   | 12     | <b>1.90</b> | 2.88        | <b>3.02</b> | 3.13        | <b>1.90</b>   | 2.88        |
| 5MZWB_95_106    | 12     | 0.87        | <b>0.54</b> | 2.76        | <b>0.84</b> | 1.63          | <b>0.54</b> |
| 2CB1A_200_212   | 13     | 2.83        | <b>2.49</b> | 6.52        | <b>3.30</b> | 4.36          | <b>3.30</b> |
| 3AYRA_109_121   | 13     | 2.61        | <b>2.07</b> | <b>3.17</b> | 9.84        | <b>3.17</b>   | 4.56        |
| 3TN4A_228_241   | 13     | <b>1.55</b> | 1.65        | 6.80        | <b>1.65</b> | 1.77          | <b>1.65</b> |
| 4ETNA_111_123   | 13     | 1.04        | <b>0.56</b> | 1.33        | <b>0.56</b> | 1.04          | <b>0.56</b> |
| 4EUUA_189_201   | 13     | 1.12        | <b>0.87</b> | <b>1.90</b> | 1.91        | 1.12          | <b>0.97</b> |
| 4QV2A_536_548   | 13     | <b>0.66</b> | 1.55        | <b>0.66</b> | 3.13        | <b>0.66</b>   | 1.89        |
| 5E56A_53_65     | 13     | 3.50        | <b>3.37</b> | <b>4.48</b> | 6.28        | <b>4.07</b>   | 5.11        |
| 5IRCA_1276_1288 | 13     | 3.18        | <b>1.63</b> | 8.80        | <b>3.25</b> | 3.75          | <b>2.70</b> |
| 2HC9A_258_271   | 14     | <b>3.63</b> | 4.55        | <b>5.71</b> | 7.70        | 5.71          | <b>4.98</b> |
| 2OZLA_55_68     | 14     | 2.12        | <b>1.50</b> | <b>2.60</b> | 5.24        | <b>2.12</b>   | 2.41        |
| 2VHKA_177_190   | 14     | <b>2.82</b> | 4.09        | <b>5.98</b> | 7.50        | <b>5.10</b>   | 6.62        |
| 2YIMA_113_126   | 14     | 2.76        | <b>2.56</b> | <b>3.30</b> | 10.89       | <b>3.30</b>   | 4.14        |
| 3ACHA_69_82     | 14     | <b>2.23</b> | 2.83        | <b>5.53</b> | 5.67        | 4.15          | <b>2.88</b> |
| 3QLIA_262_275   | 14     | <b>2.17</b> | 2.56        | 6.67        | <b>5.70</b> | <b>2.17</b>   | 3.15        |
| 3UN7A_461_474   | 14     | 3.66        | <b>3.18</b> | <b>9.37</b> | 15.50       | 6.77          | <b>5.11</b> |
| 3ZO9A_554_567   | 14     | <b>1.86</b> | 2.44        | <b>1.86</b> | 6.08        | <b>1.86</b>   | 2.58        |
| 4AUKA_27_40     | 14     | 2.51        | <b>1.73</b> | <b>2.59</b> | 2.87        | <b>2.51</b>   | 2.87        |
| 4MDYA_204_217   | 14     | <b>1.25</b> | 2.00        | <b>1.92</b> | 5.03        | <b>1.25</b>   | 2.14        |
| 4P5PA_183_196   | 14     | 2.81        | <b>2.51</b> | 7.04        | <b>3.45</b> | 3.47          | <b>3.45</b> |
| 1APYA_49_63     | 15     | 3.24        | <b>2.67</b> | <b>5.38</b> | 8.94        | 5.38          | <b>3.11</b> |
| 1KQPA_205_219   | 15     | 2.12        | <b>1.62</b> | 4.10        | <b>1.77</b> | 2.46          | <b>1.77</b> |
| 1N5UA_490_504   | 15     | <b>1.94</b> | 2.42        | <b>3.01</b> | 3.43        | <b>2.51</b>   | 2.65        |

## 2. General target set results

### (h) Full MODELLER results (cont.)

| Target          | Length | Best        |             | Top Ranked  |              | Best of Top 5 |             |
|-----------------|--------|-------------|-------------|-------------|--------------|---------------|-------------|
|                 |        | Normal      | Contacts    | Normal      | Contacts     | Normal        | Contacts    |
| 1YSQA_87_101    | 15     | <b>2.57</b> | 2.95        | <b>4.75</b> | 6.21         | 4.75          | <b>3.46</b> |
| 1ZUOA_333_347   | 15     | <b>1.95</b> | 2.19        | 2.98        | <b>2.42</b>  | <b>2.22</b>   | 2.34        |
| 2RB9A_189_203   | 15     | 2.23        | <b>2.03</b> | 3.25        | <b>2.69</b>  | <b>2.23</b>   | 2.69        |
| 2VNGA_125_139   | 15     | 2.99        | 2.99        | 7.21        | <b>6.25</b>  | <b>2.99</b>   | 4.96        |
| 3IT3A_60_74     | 15     | 2.76        | <b>0.56</b> | 2.76        | <b>0.56</b>  | 2.76          | <b>0.56</b> |
| 4A4AA_818_832   | 15     | 1.74        | <b>1.49</b> | <b>1.74</b> | 4.07         | <b>1.74</b>   | 2.16        |
| 4ANOA_123_137   | 15     | <b>3.09</b> | 3.28        | 8.14        | <b>5.26</b>  | <b>3.09</b>   | 5.26        |
| 4E9XA_1073_1087 | 15     | 3.42        | <b>1.70</b> | 5.70        | <b>1.70</b>  | 4.31          | <b>1.70</b> |
| 4LZKA_32_46     | 15     | 2.59        | <b>2.39</b> | 6.56        | <b>5.16</b>  | 3.27          | <b>2.39</b> |
| 1IUJA_75_90     | 16     | <b>3.81</b> | 4.07        | 10.96       | <b>8.32</b>  | 4.75          | <b>4.46</b> |
| 2BGKA_99_114    | 16     | 2.73        | <b>2.48</b> | 10.54       | <b>8.44</b>  | <b>4.91</b>   | 5.05        |
| 2Q88A_192_207   | 16     | 1.40        | <b>1.27</b> | 3.06        | <b>1.59</b>  | 2.16          | <b>1.59</b> |
| 3ZX4A_219_234   | 16     | 2.02        | <b>1.35</b> | 2.02        | <b>1.52</b>  | 2.02          | <b>1.35</b> |
| 4LM8A_125_140   | 16     | <b>2.49</b> | 2.83        | 3.74        | <b>3.38</b>  | 3.08          | <b>2.85</b> |
| 5DAWA_162_177   | 16     | 3.37        | <b>0.58</b> | 6.48        | <b>4.85</b>  | 4.60          | <b>0.58</b> |
| 5KKQA_375_390   | 16     | 2.43        | <b>1.61</b> | <b>7.28</b> | 11.56        | 7.28          | <b>2.53</b> |
| 5LX8A_538_553   | 16     | 3.27        | <b>2.76</b> | <b>4.23</b> | 5.28         | <b>4.04</b>   | 4.05        |
| 1GQIA_550_566   | 17     | 3.87        | <b>3.17</b> | <b>3.87</b> | 4.48         | 3.87          | <b>3.54</b> |
| 1U7BA_118_134   | 17     | <b>1.25</b> | 1.29        | <b>1.86</b> | 2.05         | 1.43          | 1.43        |
| 2DSKA_626_642   | 17     | <b>1.35</b> | 2.15        | <b>1.35</b> | 2.70         | <b>1.35</b>   | 2.15        |
| 2I5VO_248_264   | 17     | 3.38        | <b>2.36</b> | 6.99        | <b>4.34</b>  | 5.53          | <b>3.57</b> |
| 2P9BA_386_402   | 17     | 3.57        | <b>1.85</b> | 7.35        | <b>2.83</b>  | 7.35          | <b>2.83</b> |
| 3DCMX_11_27     | 17     | 5.17        | <b>4.91</b> | <b>5.55</b> | 11.44        | 5.55          | <b>4.91</b> |
| 3F2VA_85_101    | 17     | 4.49        | <b>4.29</b> | 7.97        | <b>5.77</b>  | <b>5.55</b>   | 5.77        |
| 3VENA_464_480   | 17     | 3.96        | <b>2.15</b> | 5.74        | <b>4.52</b>  | 4.31          | <b>2.15</b> |
| 4HDRB_125_141   | 17     | <b>3.59</b> | 3.81        | 12.08       | <b>7.18</b>  | 11.65         | <b>6.14</b> |
| 5B0NA_124_140   | 17     | 2.40        | <b>1.48</b> | 4.07        | <b>2.14</b>  | 2.83          | <b>1.93</b> |
| 5CDKA_105_121   | 17     | 4.22        | <b>1.56</b> | 16.96       | <b>3.81</b>  | 4.89          | <b>2.81</b> |
| 5LSVA_26_42     | 17     | <b>2.94</b> | 3.28        | <b>2.94</b> | 12.77        | <b>2.94</b>   | 10.76       |
| 1GAIA_254_271   | 18     | 3.12        | <b>2.68</b> | 4.09        | <b>2.68</b>  | 3.97          | <b>2.68</b> |
| 1QQFA_1058_1075 | 18     | 4.75        | <b>2.43</b> | 10.34       | <b>10.10</b> | 7.65          | <b>2.97</b> |
| 1UM0A_211_228   | 18     | 3.83        | <b>3.08</b> | 13.68       | <b>6.04</b>  | <b>3.83</b>   | 4.42        |
| 2GGSA_112_128   | 18     | 3.89        | <b>3.30</b> | 11.89       | <b>4.34</b>  | 4.40          | <b>3.35</b> |
| 2XZIA_39_56     | 18     | 3.79        | <b>3.35</b> | <b>8.95</b> | 9.41         | <b>4.33</b>   | 9.41        |
| 3UV0A_26_43     | 18     | 3.95        | <b>2.83</b> | 10.19       | <b>2.83</b>  | 10.19         | <b>2.83</b> |
| 3VSVA_6_23      | 18     | 7.44        | <b>4.24</b> | 10.96       | <b>5.79</b>  | 9.33          | <b>4.37</b> |
| 4B4HA_526_543   | 18     | 3.82        | <b>3.08</b> | <b>4.27</b> | 7.27         | <b>4.27</b>   | 5.52        |
| 4R9OA_85_102    | 18     | 4.24        | <b>4.14</b> | 10.83       | <b>9.82</b>  | 8.56          | <b>6.18</b> |
| 5H3ZA_1072_1089 | 18     | 4.22        | <b>4.14</b> | 10.76       | <b>8.18</b>  | <b>6.37</b>   | 6.46        |

### Average results:

| Length | No. Targets | Best        |             | Top Ranked  |             | Best of Top 5 |             |
|--------|-------------|-------------|-------------|-------------|-------------|---------------|-------------|
|        |             | Normal      | Contacts    | Normal      | Contacts    | Normal        | Contacts    |
| 10     | 14          | 1.00        | <b>0.83</b> | 1.83        | <b>1.28</b> | 1.12          | <b>0.97</b> |
| 11     | 13          | 1.58        | <b>1.32</b> | <b>2.79</b> | 2.99        | 2.54          | <b>1.89</b> |
| 12     | 13          | 1.83        | <b>1.53</b> | 4.23        | <b>3.38</b> | 2.61          | <b>2.18</b> |
| 13     | 8           | 2.06        | <b>1.77</b> | 4.21        | <b>3.74</b> | <b>2.49</b>   | 2.59        |
| 14     | 11          | <b>2.53</b> | 2.72        | <b>4.78</b> | 6.87        | <b>3.49</b>   | 3.66        |
| 15     | 12          | 2.55        | <b>2.19</b> | 4.63        | <b>4.04</b> | 3.14          | <b>2.76</b> |
| 16     | 8           | 2.69        | <b>2.12</b> | 6.04        | <b>5.62</b> | 4.11          | <b>2.81</b> |
| 17     | 12          | 3.35        | <b>2.69</b> | 6.39        | <b>5.34</b> | 4.77          | <b>4.00</b> |
| 18     | 10          | 4.31        | <b>3.33</b> | 9.60        | <b>6.65</b> | 6.29          | <b>4.82</b> |
| ALL    | 101         | 2.36        | <b>2.00</b> | 4.75        | <b>4.26</b> | 3.28          | <b>2.76</b> |

## 2. General target set results

### (i) MODELLER RMSD distributions

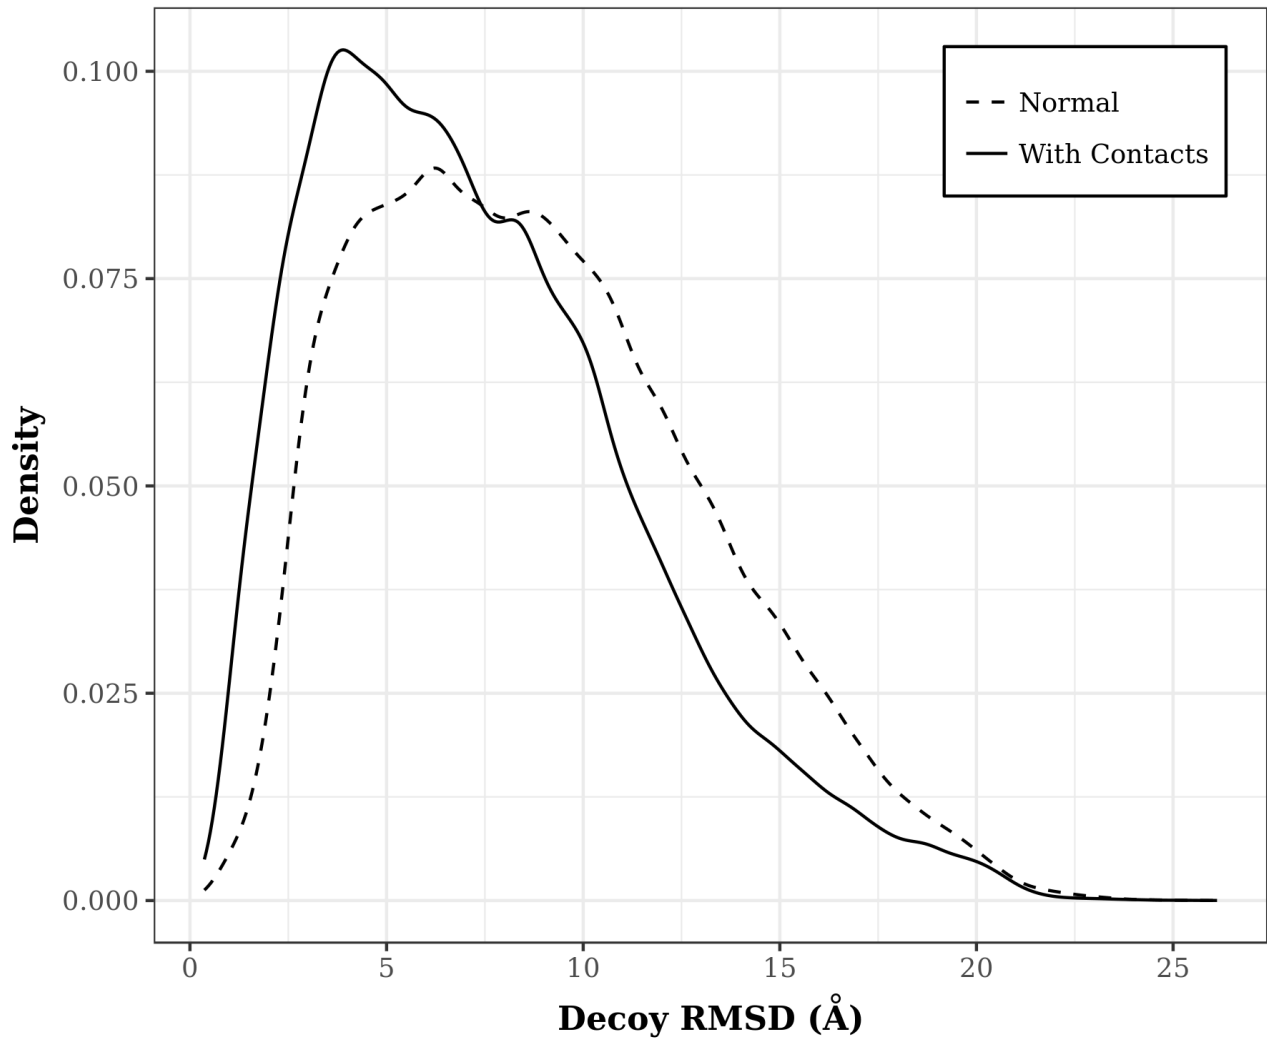

Distributions of RMSDs for decoy ensembles produced by MODELLER, comparing those generated normally, i.e. without predicted contact information, with those produced using constraints based on the results of contact prediction. Each distribution shown is a combination of those from the 101 individual targets (1000 decoys per target).

### 3. General target set results - non-native environment

#### (a) Accuracy of MODELLER-generated protein models

Anchor RMSDs were calculated across backbone atoms only, after superposition of the entire model with TAlign. Anchor residues are defined as the two residues on each side of the target loop.

| Target          | Length | TM score | Anchor RMSD | Target            | Length | TM score | Anchor RMSD |
|-----------------|--------|----------|-------------|-------------------|--------|----------|-------------|
| 1F74A_105_114   | 10     | 0.98     | 0.19        | 2YIMA_113_126     | 14     | 0.96     | 0.69        |
| 1NU4A_73_82     | 10     | 0.91     | 0.48        | ✗ 3ACHA_69_82     | 14     | 0.31     | 18.46       |
| 1Y0PA_168_177   | 10     | 1.00     | 0.21        | 3QLIA_262_275     | 14     | 0.99     | 0.28        |
| 1ZJCA_18_27     | 10     | 0.97     | 0.63        | 3UN7A_461_474     | 14     | 0.96     | 0.15        |
| 2IVFA_677_686   | 10     | 0.92     | 0.84        | ● 3ZO9A_554_567   | 14     | 0.99     | 0.53        |
| ✗ 2PN1A_95_104  | 10     | 0.62     | 4.14        | ✗ 4AUKA_27_40     | 14     | 0.28     | 395.50      |
| 3JQYA_109_118   | 10     | 0.85     | 2.44        | 4MDYA_204_217     | 14     | 0.98     | 0.78        |
| 3PHXB_127_136   | 10     | 0.75     | 1.89        | 4P5PA_183_196     | 14     | 0.92     | 0.76        |
| 4FFJA_164_173   | 10     | 0.95     | 0.78        | 1APYA_49_63       | 15     | 0.80     | 2.36        |
| ✗ 4MGQA_173_182 | 10     | 0.20     | 18.83       | 1KQPA_205_219     | 15     | 0.99     | 0.68        |
| 4N68A_955_964   | 10     | 0.86     | 0.45        | ● 1N5UA_490_504   | 15     | 0.99     | 0.94        |
| 4W8HA_194_203   | 10     | 0.97     | 0.95        | 1YSQA_87_101      | 15     | 0.83     | 2.70        |
| 5J41A_140_149   | 10     | 0.99     | 0.48        | 1ZUOA_333_347     | 15     | 0.95     | 0.70        |
| 5JRHA_331_340   | 10     | 1.00     | 0.12        | 2RB9A_189_203     | 15     | 0.85     | 1.53        |
| 1KGDA_854_864   | 11     | 0.90     | 1.50        | 2VNGA_125_139     | 15     | 0.93     | 0.27        |
| 2D5BA_9_19      | 11     | 0.99     | 0.36        | 3IT3A_60_74       | 15     | 0.98     | 0.23        |
| 2Y78A_17_27     | 11     | 0.78     | 1.43        | 4A4AA_818_832     | 15     | 1.00     | 0.18        |
| 3L5LA_65_75     | 11     | 1.00     | 0.21        | ✗ 4ANOA_123_137   | 15     | 0.24     | 18.95       |
| 3PMEA_1048_1058 | 11     | 0.96     | 0.29        | 4E9XA_1073_1087   | 15     | 0.99     | 0.47        |
| 3VKWA_891_901   | 11     | 0.86     | 1.02        | ✗ 4LZKA_32_46     | 15     | 0.78     | 5.13        |
| 4DV8A_488_498   | 11     | 0.91     | 0.57        | ✗ 1IUJA_75_90     | 16     | 0.54     | 24.35       |
| 4ITBA_102_112   | 11     | 1.00     | 0.37        | 2BGKA_99_114      | 16     | 0.83     | 1.80        |
| ✗ 4UZGA_426_436 | 11     | 0.38     | 8.31        | ✗ 2Q88A_192_207   | 16     | 0.67     | 5.68        |
| 4YFUA_620_630   | 11     | 0.98     | 0.58        | ✗ 3ZX4A_219_234   | 16     | 0.84     | 5.63        |
| 4ZMYA_40_50     | 11     | 0.81     | 1.21        | ✗ 4LM8A_125_140   | 16     | 0.77     | 7.08        |
| ✗ 5CENA_253_263 | 11     | 0.90     | 8.45        | 5DAWA_162_177     | 16     | 0.92     | 0.89        |
| 5IOJA_406_416   | 11     | 1.00     | 0.23        | 5KKQA_375_390     | 16     | 0.72     | 1.77        |
| 1DJ7A_51_62     | 12     | 0.97     | 0.64        | 5LX8A_538_553     | 16     | 0.99     | 0.42        |
| 1JS1X_273_284   | 12     | 0.95     | 1.08        | 1GQIA_550_566     | 17     | 1.00     | 0.15        |
| 1O00B_104_115   | 12     | 0.96     | 0.24        | 1U7BA_118_134     | 17     | 0.99     | 0.34        |
| 1UF5A_66_77     | 12     | 1.00     | 0.19        | 2DSKA_626_642     | 17     | 1.00     | 0.18        |
| ✗ 1W2WB_367_378 | 12     | 0.83     | 3.12        | 2I5VO_248_264     | 17     | 0.95     | 0.99        |
| 2C4EA_278_289   | 12     | 0.88     | 2.23        | 2P9BA_386_402     | 17     | 0.85     | 0.68        |
| 2ICGA_16_27     | 12     | 0.80     | 2.35        | ✗ 3DCMX_11_27     | 17     | 0.31     | 16.65       |
| 3NIOA_45_56     | 12     | 0.93     | 1.02        | 3F2VA_85_101      | 17     | 0.93     | 0.45        |
| 3UUEA_57_68     | 12     | 1.00     | 0.30        | 3VENA_464_480     | 17     | 0.99     | 1.50        |
| 4B6IA_85_96     | 12     | 0.85     | 2.37        | 4HDRB_125_141     | 17     | 0.93     | 0.82        |
| 5AVDA_224_235   | 12     | 0.98     | 0.51        | 5B0NA_124_140     | 17     | 0.80     | 2.66        |
| 5C9LA_103_114   | 12     | 0.99     | 0.19        | 5CDKA_105_121     | 17     | 0.91     | 2.01        |
| 5MZWB_95_106    | 12     | 0.99     | 0.41        | ✗ 5LSVA_26_42     | 17     | 0.27     | 21.45       |
| 2CB1A_200_212   | 13     | 0.95     | 0.35        | 1GAIA_254_271     | 18     | 1.00     | 0.12        |
| 3AYRA_109_121   | 13     | 0.98     | 0.19        | 1QQFA_1058_1075   | 18     | 0.99     | 0.20        |
| 3TN4A_228_241   | 13     | 0.99     | 0.19        | ✗ 1UM0A_211_228   | 18     | 0.78     | 3.59        |
| 4ETNA_111_123   | 13     | 0.99     | 0.36        | 2GGSA_112_128     | 18     | 0.85     | 0.32        |
| 4EUUA_189_201   | 13     | 0.98     | 0.61        | 2XZIA_39_56       | 18     | 1.00     | 0.15        |
| 4QV2A_536_548   | 13     | 0.92     | 0.47        | ✗ 3UV0A_26_43     | 18     | 0.35     | 6.33        |
| 5E56A_53_65     | 13     | 0.91     | 0.39        | ✗ 3VSVA_6_23      | 18     | 0.47     | 2.13        |
| 5IRCA_1276_1288 | 13     | 0.96     | 0.52        | 4B4HA_526_543     | 18     | 0.99     | 1.68        |
| 2HC9A_258_271   | 14     | 0.88     | 0.56        | 4R9OA_85_102      | 18     | 0.99     | 0.19        |
| 2OZLA_55_68     | 14     | 1.00     | 0.22        | ✗ 5H3ZA_1072_1089 | 18     | 0.59     | 12.06       |
| 2VHKA_177_190   | 14     | 1.00     | 0.21        |                   |        |          |             |

✗ = Omitted due to poor model quality (TM score < 0.5 or anchor RMSD > 3Å)

● = Omitted due to having <2 predicted contacts remaining after ignoring those which were never satisfied (Sphinx only)

### 3. General target set results - non-native environment

#### (b) Full Sphinx results

Best = RMSD of the best (i.e. closest to native) decoy generated

Best of Top 500 = RMSD of the best decoy remaining in the set after filtering using Sphinx's scoring function

Top Ranked = RMSD of the decoy predicted to be the best by the SOAP-Loop scoring function

Best of Top 5 = RMSD of the best decoy in the top five as ranked by SOAP-Loop

All RMSDs are global backbone RMSDs.

| Target          | Length | Best | Best of Top 500 |             | Top Ranked   |             | Best of Top 5 |             |
|-----------------|--------|------|-----------------|-------------|--------------|-------------|---------------|-------------|
|                 |        |      | Normal          | Contacts    | Normal       | Contacts    | Normal        | Contacts    |
| 1F74A_105_114   | 10     | 0.25 | 0.25            | 0.25        | 0.45         | 0.45        | 0.45          | 0.45        |
| 1NU4A_73_82     | 10     | 0.36 | 0.46            | 0.46        | 0.57         | 0.57        | 0.57          | 0.57        |
| 1Y0PA_168_177   | 10     | 0.24 | 0.24            | 0.24        | 0.29         | 0.29        | 0.29          | 0.29        |
| 1ZJCA_18_27     | 10     | 1.86 | 3.03            | <b>1.86</b> | 6.95         | <b>5.29</b> | 5.67          | <b>3.03</b> |
| 2IVFA_677_686   | 10     | 0.44 | 0.44            | 0.44        | 0.65         | 0.65        | 0.65          | 0.65        |
| 3JQYA_109_118   | 10     | 2.51 | 2.51            | 2.51        | 3.52         | 3.52        | 2.70          | 2.70        |
| 3PHXB_127_136   | 10     | 0.90 | 0.96            | <b>0.90</b> | 2.64         | 2.64        | 1.80          | 1.80        |
| 4FFJA_164_173   | 10     | 1.38 | 2.13            | <b>1.38</b> | 8.84         | <b>3.41</b> | 7.38          | <b>2.13</b> |
| 4N68A_955_964   | 10     | 0.46 | 0.47            | <b>0.46</b> | 0.57         | 0.57        | 0.47          | 0.47        |
| 4W8HA_194_203   | 10     | 1.22 | 1.34            | <b>1.22</b> | 3.23         | 3.23        | 3.23          | 3.23        |
| 5J41A_140_149   | 10     | 0.90 | 1.23            | <b>0.90</b> | 1.23         | 1.23        | 1.23          | <b>1.05</b> |
| 5JRHA_331_340   | 10     | 0.36 | <b>0.36</b>     | 1.29        | <b>1.53</b>  | 1.93        | <b>0.46</b>   | 1.78        |
| 1KGDA_854_864   | 11     | 1.53 | 2.04            | <b>1.95</b> | <b>7.25</b>  | 7.98        | 5.24          | <b>3.49</b> |
| 2D5BA_9_19      | 11     | 1.73 | 2.00            | 2.00        | 4.77         | 4.77        | 4.77          | <b>2.80</b> |
| 2Y78A_17_27     | 11     | 1.26 | 1.42            | <b>1.41</b> | 2.38         | 2.38        | 2.05          | <b>1.99</b> |
| 3L5LA_65_75     | 11     | 0.12 | 0.12            | 0.12        | 0.12         | 0.12        | 0.12          | 0.12        |
| 3PMEA_1048_1058 | 11     | 0.37 | 0.37            | 0.37        | 0.82         | 0.82        | 0.60          | 0.60        |
| 3VKWA_891_901   | 11     | 1.85 | 2.05            | <b>2.01</b> | 4.49         | 4.49        | <b>3.42</b>   | 4.36        |
| 4DV8A_488_498   | 11     | 0.69 | 0.69            | 0.69        | 0.84         | 0.84        | 0.84          | 0.84        |
| 4ITBA_102_112   | 11     | 0.37 | 0.37            | 0.37        | 0.49         | 0.49        | 0.37          | 0.37        |
| 4YFUA_620_630   | 11     | 0.32 | 0.42            | <b>0.33</b> | 0.63         | <b>0.42</b> | 0.63          | <b>0.42</b> |
| 4ZMYA_40_50     | 11     | 0.46 | <b>0.63</b>     | 2.52        | <b>1.74</b>  | 7.68        | <b>1.48</b>   | 6.75        |
| 5IOJA_406_416   | 11     | 1.87 | <b>1.87</b>     | 2.39        | 3.06         | 3.06        | <b>1.87</b>   | 2.44        |
| 1DJ7A_51_62     | 12     | 0.30 | 0.53            | <b>0.30</b> | 0.96         | <b>0.83</b> | <b>0.53</b>   | 0.71        |
| 1JS1X_273_284   | 12     | 0.51 | 0.84            | <b>0.71</b> | 1.02         | 1.02        | 1.02          | <b>0.90</b> |
| 1OO0B_104_115   | 12     | 0.37 | 0.37            | 0.37        | 0.87         | 0.87        | 0.37          | 0.37        |
| 1UF5A_66_77     | 12     | 0.44 | 4.70            | <b>0.44</b> | 6.28         | <b>0.44</b> | 6.28          | <b>0.44</b> |
| 2C4EA_278_289   | 12     | 2.19 | 4.87            | <b>2.76</b> | 10.19        | 10.19       | 6.82          | 6.82        |
| 2ICGA_16_27     | 12     | 2.43 | 4.74            | <b>3.10</b> | 11.78        | <b>6.94</b> | 5.98          | 5.98        |
| 3NIOA_45_56     | 12     | 2.17 | 2.46            | <b>2.30</b> | 4.30         | <b>3.26</b> | 2.74          | 2.74        |
| 3UUEA_57_68     | 12     | 0.84 | 0.96            | <b>0.84</b> | 0.96         | 0.96        | 0.96          | <b>0.84</b> |
| 4B6IA_85_96     | 12     | 2.76 | 3.95            | <b>3.01</b> | <b>7.63</b>  | 8.11        | <b>4.09</b>   | 4.50        |
| 5AVDA_224_235   | 12     | 0.54 | 0.79            | <b>0.54</b> | 1.17         | 1.17        | 1.00          | 1.00        |
| 5C9LA_103_114   | 12     | 1.96 | 3.62            | <b>2.56</b> | 3.62         | 3.62        | 3.62          | 3.62        |
| 5MZWB_95_106    | 12     | 1.15 | 1.15            | 1.15        | 3.01         | <b>2.84</b> | 2.47          | 2.47        |
| 2CB1A_200_212   | 13     | 0.56 | 0.56            | 0.56        | 0.88         | 0.88        | 0.56          | 0.56        |
| 3AYRA_109_121   | 13     | 1.10 | <b>3.61</b>     | 3.65        | 7.83         | <b>6.22</b> | 5.60          | <b>5.46</b> |
| 3TN4A_229_241   | 13     | 0.48 | 0.79            | 0.79        | 3.52         | <b>0.79</b> | 2.77          | <b>0.79</b> |
| 4ETNA_111_123   | 13     | 0.91 | 0.96            | <b>0.91</b> | 1.45         | 1.45        | 1.16          | 1.16        |
| 4EUUA_189_201   | 13     | 1.10 | 1.10            | 1.10        | 1.88         | 1.88        | 1.88          | 1.88        |
| 4QV2A_536_548   | 13     | 2.44 | 2.77            | <b>2.44</b> | 6.83         | 6.83        | 6.61          | <b>3.83</b> |
| 5E56A_53_65     | 13     | 2.09 | 2.88            | <b>2.79</b> | 3.46         | 3.46        | 3.46          | 3.46        |
| 5IRCA_1276_1288 | 13     | 0.40 | 0.40            | 0.40        | 0.44         | 0.44        | 0.44          | 0.44        |
| 2HC9A_258_271   | 14     | 3.35 | <b>4.34</b>     | 4.72        | 9.65         | <b>8.03</b> | <b>5.24</b>   | 7.41        |
| 2OZLA_55_68     | 14     | 0.27 | 0.27            | 0.27        | 0.59         | 0.59        | 0.27          | 0.27        |
| 2VHKA_177_190   | 14     | 1.92 | <b>3.51</b>     | 5.22        | 7.59         | 7.59        | 7.59          | 7.59        |
| 2YIMA_113_126   | 14     | 0.94 | 0.94            | 0.94        | 0.94         | 0.94        | 0.94          | 0.94        |
| 3QLIA_262_275   | 14     | 0.21 | 0.21            | 0.21        | 0.39         | 0.39        | 0.26          | 0.26        |
| 3UN7A_461_474   | 14     | 1.69 | 4.56            | <b>3.98</b> | <b>7.47</b>  | 10.29       | 6.14          | <b>4.56</b> |
| 4MDYA_204_217   | 14     | 2.47 | 4.98            | <b>4.77</b> | <b>10.23</b> | 10.39       | 10.23         | <b>7.89</b> |
| 4P5PA_183_196   | 14     | 1.76 | 3.22            | <b>2.96</b> | 6.78         | 6.78        | 6.78          | 6.78        |
| 1APYA_49_63     | 15     | 1.04 | 1.25            | <b>1.04</b> | 1.63         | <b>1.30</b> | 1.36          | <b>1.30</b> |
| 1KQPA_205_219   | 15     | 1.98 | 4.57            | <b>1.98</b> | <b>10.84</b> | 12.79       | 10.21         | <b>4.28</b> |
| 1YSQA_87_101    | 15     | 2.42 | 2.73            | 2.73        | 13.54        | <b>5.94</b> | 10.02         | <b>4.73</b> |
| 1ZUOA_333_347   | 15     | 1.26 | 1.26            | 1.26        | 1.53         | 1.53        | 1.27          | 1.27        |
| 2RB9A_189_203   | 15     | 2.53 | 2.97            | <b>2.58</b> | 6.18         | <b>5.11</b> | 2.97          | 2.97        |
| 2VNGA_125_139   | 15     | 3.16 | 3.79            | <b>3.58</b> | 5.37         | <b>4.77</b> | 5.05          | <b>4.77</b> |
| 3IT3A_60_74     | 15     | 1.36 | 1.36            | 1.36        | 4.86         | 4.86        | 1.36          | 1.36        |
| 4A4AA_818_832   | 15     | 0.56 | 0.56            | 0.56        | 0.56         | 0.56        | 0.56          | 0.56        |
| 4E9XA_1073_1087 | 15     | 0.60 | 0.60            | 0.60        | 0.68         | 0.68        | 0.60          | 0.60        |
| 2BGKA_99_114    | 16     | 2.45 | 2.45            | 2.45        | <b>9.71</b>  | 11.61       | 8.06          | <b>7.00</b> |

**3. General target set results - non-native environment**  
**(b) Full Sphinx results (cont.)**

| Target          | Length | Best | Best of Top 500 |             | Top Ranked   |             | Best of Top 5 |             |
|-----------------|--------|------|-----------------|-------------|--------------|-------------|---------------|-------------|
|                 |        |      | Normal          | Contacts    | Normal       | Contacts    | Normal        | Contacts    |
| 5DAWA_162_177   | 16     | 0.95 | 0.95            | 0.95        | 1.01         | 1.01        | 0.99          | 0.99        |
| 5KKQA_375_390   | 16     | 1.35 | 1.35            | 1.35        | 4.38         | 4.38        | 1.76          | 1.76        |
| 5LX8A_538_553   | 16     | 1.88 | 3.49            | <b>3.23</b> | <b>5.05</b>  | 8.26        | <b>4.97</b>   | 4.98        |
| 1GQIA_550_566   | 17     | 0.14 | 0.14            | 0.14        | 0.30         | 0.30        | 0.14          | 0.14        |
| 1U7BA_118_134   | 17     | 0.93 | <b>0.93</b>     | 1.45        | 1.48         | 1.48        | <b>1.22</b>   | 1.48        |
| 2DSKA_626_642   | 17     | 0.18 | 0.18            | 0.18        | 0.32         | 0.32        | 0.18          | 0.18        |
| 2I5VO_248_264   | 17     | 0.61 | <b>0.68</b>     | <b>0.64</b> | 1.84         | 1.84        | 1.16          | 1.16        |
| 2P9BA_386_402   | 17     | 0.29 | <b>0.29</b>     | 0.49        | 0.82         | <b>0.66</b> | 0.68          | <b>0.66</b> |
| 3F2VA_85_101    | 17     | 0.98 | 0.98            | 0.98        | 4.13         | 4.13        | 1.17          | 1.17        |
| 3VENA_464_480   | 17     | 0.59 | 0.59            | 0.59        | 1.05         | 1.05        | 0.75          | 0.75        |
| 4HDRB_125_141   | 17     | 3.48 | 7.32            | <b>5.79</b> | <b>11.70</b> | 13.85       | 11.70         | <b>6.52</b> |
| 5B0NA_124_140   | 17     | 1.58 | 1.78            | <b>1.58</b> | <b>5.32</b>  | 6.68        | 2.72          | 2.72        |
| 5CDKA_105_121   | 17     | 2.09 | 4.28            | <b>2.13</b> | 9.67         | 9.67        | 6.30          | <b>2.67</b> |
| 1GAIA_254_271   | 18     | 0.77 | 0.77            | 0.77        | 0.77         | 0.77        | 0.77          | 0.77        |
| 1QQFA_1058_1075 | 18     | 0.24 | 0.26            | <b>0.24</b> | 0.41         | 0.41        | 0.40          | <b>0.37</b> |
| 2GGSA_111_128   | 18     | 0.88 | 5.64            | <b>1.58</b> | 17.47        | <b>1.58</b> | 15.99         | <b>1.58</b> |
| 2XZIA_39_56     | 18     | 0.51 | 0.51            | 0.51        | 1.16         | <b>0.89</b> | 0.51          | 0.51        |
| 4B4HA_526_543   | 18     | 0.81 | 0.81            | 0.81        | 1.00         | 1.00        | <b>0.88</b>   | 0.96        |
| 4R9OA_85_102    | 18     | 0.44 | 0.69            | <b>0.44</b> | 11.39        | <b>0.59</b> | 0.70          | <b>0.59</b> |

**Average results:**

| Length | No. Targets | Best | Best of Top 500 |             | Top Ranked  |             | Best of Top 5 |             |
|--------|-------------|------|-----------------|-------------|-------------|-------------|---------------|-------------|
|        |             |      | Normal          | Contacts    | Normal      | Contacts    | Normal        | Contacts    |
| 10     | 12          | 0.91 | 1.12            | <b>0.99</b> | 2.54        | <b>1.98</b> | 2.07          | <b>1.51</b> |
| 11     | 11          | 0.96 | <b>1.09</b>     | 1.29        | <b>2.42</b> | 3.00        | <b>1.94</b>   | 2.20        |
| 12     | 12          | 1.31 | 2.41            | <b>1.51</b> | 4.32        | <b>3.35</b> | 2.99          | <b>2.53</b> |
| 13     | 8           | 1.13 | 1.63            | <b>1.58</b> | 3.29        | <b>2.74</b> | 2.81          | <b>2.20</b> |
| 14     | 8           | 1.57 | <b>2.75</b>     | 2.88        | <b>5.45</b> | 5.62        | 4.68          | <b>4.46</b> |
| 15     | 9           | 1.66 | 2.12            | <b>1.74</b> | 5.02        | <b>4.17</b> | 3.71          | <b>2.43</b> |
| 16     | 4           | 1.66 | 2.06            | <b>2.00</b> | <b>5.04</b> | 6.31        | 3.94          | <b>3.68</b> |
| 17     | 10          | 1.09 | 1.72            | <b>1.40</b> | <b>3.66</b> | 4.00        | 2.60          | <b>1.75</b> |
| 18     | 6           | 0.61 | 1.45            | <b>0.72</b> | 5.37        | <b>0.87</b> | 3.21          | <b>0.80</b> |
| ALL    | 80          | 1.19 | 1.78            | <b>1.52</b> | 3.91        | <b>3.40</b> | 2.96          | <b>2.31</b> |

#### 4. Membrane protein target set results

##### (a) MetaPSICOV contact prediction results - contacts involving at least one target loop residue

| Target            | Length | No Predicted | No Correct |
|-------------------|--------|--------------|------------|
| ✗ 1SUMB_108_117   | 10     | 0            | 0          |
| 2ERVA_129_138     | 10     | 19           | 15         |
| 2RH1A_137_146     | 10     | 6            | 2          |
| 2YNKA_225_234     | 10     | 5            | 4          |
| 2ZXEA_353_362     | 10     | 7            | 6          |
| ✗ 3M73A_130_139   | 10     | 1            | 0          |
| ✗ 3QAPA_56_65     | 10     | 1            | 1          |
| ✗ 3WFDB_416_425   | 10     | 0            | 0          |
| 4AL0A_53_62       | 10     | 4            | 4          |
| 4BVNA_195_204     | 10     | 2            | 1          |
| 4C9GA_258_267     | 10     | 10           | 6          |
| ✗ 4J05A_196_205   | 10     | 0            | 0          |
| ✗ 4JKVA_433_442   | 10     | 1            | 0          |
| ✗ 4OGQA_22_31     | 10     | 0            | 0          |
| ✗ 4US3A_124_133   | 10     | 1            | 1          |
| ✗ 5C78A_278_287   | 10     | 0            | 0          |
| 5HVXA_154_163     | 10     | 4            | 2          |
| 5KLBA_1153_1162   | 10     | 6            | 2          |
| 5LWEA_244_253     | 10     | 3            | 1          |
| ✗ 5MKKA_55_64     | 10     | 0            | 0          |
| ✗ 1FOEC_1107_1117 | 11     | 0            | 0          |
| ✗ 1JB0B_27_37     | 11     | 1            | 1          |
| ✗ 1QD6C_46_56     | 11     | 0            | 0          |
| ✗ 1RKPA_695_705   | 11     | 0            | 0          |
| 2E3QA_407_417     | 11     | 16           | 7          |
| 3GIAA_173_183     | 11     | 4            | 4          |
| 3QE7A_145_155     | 11     | 2            | 1          |
| ✗ 3RGBA_221_231   | 11     | 1            | 1          |
| ✗ 3WXXA_20_30     | 11     | 1            | 1          |
| ✗ 4AFKA_55_65     | 11     | 0            | 0          |
| 4D65A_25_35       | 11     | 14           | 11         |
| ✗ 4FC4A_126_136   | 11     | 0            | 0          |
| 4FSPA_331_341     | 11     | 9            | 7          |
| ✗ 4GCOA_187_197   | 11     | 0            | 0          |
| 4IKVA_52_62       | 11     | 2            | 2          |
| 4KT0F_94_104      | 11     | 2            | 2          |
| ✗ 4TQ3A_267_277   | 11     | 0            | 0          |
| 4U4VA_285_295     | 11     | 15           | 11         |
| 5D91A_139_149     | 11     | 2            | 2          |
| 5DL5A_390_400     | 11     | 3            | 3          |
| ✗ 1A0TP_169_180   | 12     | 1            | 0          |
| 1KF6C_94_105      | 12     | 6            | 3          |
| 2GSMA_215_226     | 12     | 4            | 3          |
| ✗ 2HDIA_345_356   | 12     | 1            | 1          |
| 2R83A_298_309     | 12     | 30           | 21         |
| 2W16A_699_710     | 12     | 22           | 14         |
| ✗ 2YEVA_226_237   | 12     | 1            | 1          |
| ✗ 3DWOX_126_137   | 12     | 0            | 0          |
| ✗ 3HD6A_110_121   | 12     | 0            | 0          |
| 3W54A_229_240     | 12     | 3            | 3          |
| ✗ 3ZOJA_70_81     | 12     | 0            | 0          |
| ✗ 4HYJA_66_77     | 12     | 0            | 0          |
| 4KNFA_168_179     | 12     | 2            | 1          |
| 4Q35A_220_231     | 12     | 19           | 9          |
| 4UVMA_397_408     | 12     | 7            | 3          |
| ✗ 5A1SA_253_264   | 12     | 1            | 1          |
| 5C6PA_46_57       | 12     | 28           | 3          |
| 5DL6A_236_247     | 12     | 10           | 4          |
| 5GLIA_204_215     | 12     | 14           | 2          |
| 5SYTA_148_159     | 12     | 5            | 5          |
| 1JB0F_90_102      | 13     | 4            | 1          |
| 1PPJC_204_216     | 13     | 2            | 1          |
| 1ZHXA_252_264     | 13     | 18           | 11         |
| ✗ 2A65A_153_165   | 13     | 1            | 0          |
| 2CFQA_137_149     | 13     | 12           | 5          |
| ✗ 2GSMA_79_91     | 13     | 0            | 0          |
| ✗ 2MPRA_198_210   | 13     | 0            | 0          |
| 2QKSA_66_78       | 13     | 2            | 2          |
| 2WSWA_163_175     | 13     | 12           | 3          |
| ✗ 2XOVA_124_136   | 13     | 0            | 0          |
| 3ABMJ_13_25       | 13     | 5            | 2          |

| Target          | Length | No Predicted | No Correct |
|-----------------|--------|--------------|------------|
| ✗ 3B9WA_161_173 | 13     | 0            | 0          |
| 3CN5A_148_160   | 13     | 3            | 2          |
| 3RKOD_58_70     | 13     | 2            | 1          |
| ● 3V2YA_281_293 | 13     | 2            | 1          |
| 3VY8X_20_32     | 13     | 5            | 2          |
| ✗ 4XNJA_201_213 | 13     | 0            | 0          |
| ✗ 4XP9C_541_553 | 13     | 1            | 0          |
| ✗ 4ZP0A_192_204 | 13     | 1            | 1          |
| ✗ 5G28A_80_92   | 13     | 0            | 0          |
| 1OKCA_239_252   | 14     | 10           | 9          |
| ✗ 3VY8X_198_211 | 14     | 0            | 0          |
| 4CU4A_513_526   | 14     | 16           | 11         |
| 4RJWA_349_362   | 14     | 2            | 2          |
| ● 4XK8L_13_26   | 14     | 2            | 1          |
| 5AEZA_366_379   | 14     | 3            | 2          |
| 5C6PA_314_327   | 14     | 21           | 17         |
| ✗ 5FVNA_199_212 | 14     | 0            | 0          |
| 5IVAA_112_125   | 14     | 6            | 5          |
| ✗ 1JB0B_104_118 | 15     | 0            | 0          |
| 1U7GA_333_347   | 15     | 3            | 3          |
| 2B2HA_320_334   | 15     | 2            | 2          |
| 2E3QA_507_521   | 15     | 23           | 18         |
| 2FGRA_156_170   | 15     | 12           | 8          |
| ✗ 2GSMB_83_97   | 15     | 0            | 0          |
| 2WSWA_302_316   | 15     | 5            | 3          |
| ✗ 3FIDA_236_250 | 15     | 1            | 1          |
| ✗ 3HB3B_60_74   | 15     | 0            | 0          |
| 3NSGA_194_208   | 15     | 5            | 4          |
| ✗ 3RKOC_50_64   | 15     | 0            | 0          |
| 3RSTA_195_209   | 15     | 4            | 2          |
| 4CU4A_651_665   | 15     | 26           | 23         |
| 4D65A_238_252   | 15     | 12           | 7          |
| ✗ 4DX5A_497_511 | 15     | 0            | 0          |
| ✗ 4XK8F_184_198 | 15     | 1            | 1          |
| 4YMKA_300_314   | 15     | 11           | 5          |
| 2W16A_595_610   | 16     | 11           | 8          |
| ✗ 2YEVA_443_458 | 16     | 1            | 1          |
| 3PBLA_170_185   | 16     | 10           | 3          |
| ✗ 4GCOA_104_119 | 16     | 0            | 0          |
| ✗ 4MKQA_56_71   | 16     | 0            | 0          |
| 5LX9A_331_346   | 16     | 8            | 6          |
| 1FOEC_1250_1266 | 17     | 5            | 4          |
| ✗ 2YEVB_64_80   | 17     | 0            | 0          |
| 3DWOX_361_377   | 17     | 11           | 9          |
| 3RKOB_356_372   | 17     | 19           | 15         |
| 3RKOC_367_383   | 17     | 16           | 8          |
| ✗ 3RQWA_286_302 | 17     | 0            | 0          |
| 3UG9A_140_156   | 17     | 23           | 17         |
| 3W4TA_219_235   | 17     | 2            | 0          |
| ✗ 4AFKA_231_247 | 17     | 0            | 0          |
| 4C7RA_210_226   | 17     | 25           | 10         |
| ✗ 5AWWY_134_150 | 17     | 0            | 0          |
| ✗ 5CXVA_169_185 | 17     | 0            | 0          |
| 5DSGA_176_192   | 17     | 6            | 3          |
| ✗ 1JB0A_228_245 | 18     | 1            | 0          |
| ✗ 1P6DA_123_140 | 18     | 1            | 1          |
| 2BHVA_199_216   | 18     | 29           | 23         |
| ✗ 3D34A_24_41   | 18     | 0            | 0          |
| ✗ 3DDLA_73_90   | 18     | 1            | 0          |
| 3FHHA_76_93     | 18     | 20           | 11         |
| 3NSGA_233_250   | 18     | 13           | 9          |
| ✗ 3RLFG_63_80   | 18     | 0            | 0          |
| 4C7RA_120_137   | 18     | 11           | 3          |
| ✗ 4LCZA_106_123 | 18     | 0            | 0          |
| 4UVMA_197_214   | 18     | 2            | 2          |
| ✗ 5B66B_45_62   | 18     | 1            | 1          |
| 2B2HA_138_156   | 19     | 23           | 14         |
| ✗ 2R9RB_183_201 | 19     | 0            | 0          |
| 3D9SA_109_127   | 19     | 3            | 3          |
| 3GD8A_137_155   | 19     | 3            | 3          |
| ✗ 3RLFF_448_466 | 19     | 0            | 0          |



#### 4. Membrane protein target set results

##### (a) MetaPSICOV contact prediction results (cont.)

| Target          | Length | No Predicted | No Correct | Target        | Length | No Predicted | No Correct |
|-----------------|--------|--------------|------------|---------------|--------|--------------|------------|
| 3VY8X_152_170   | 19     | 12           | 5          | 2WJNM_91_110  | 20     | 4            | 4          |
| 3WQJA_67_85     | 19     | 9            | 9          | 3BS0A_109_128 | 20     | 3            | 1          |
| ✘ 4EZCA_346_364 | 19     | 0            | 0          | 3FHHA_612_631 | 20     | 22           | 15         |
| 4FBZA_61_79     | 19     | 11           | 11         | 3WO6A_156_175 | 20     | 6            | 3          |
| 4PXZA_162_180   | 19     | 7            | 3          | 4D65A_153_172 | 20     | 6            | 6          |
| ✘ 4Q35A_585_603 | 19     | 0            | 0          | 4IB4A_107_126 | 20     | 15           | 8          |
| 4QIDB_70_88     | 19     | 12           | 12         | 4RDQA_255_274 | 20     | 4            | 1          |
| ✘ 5B66C_135_153 | 19     | 1            | 0          | ✘ 4RI2A_59_78 | 20     | 1            | 1          |
| 2F2BA_123_142   | 20     | 3            | 3          | 5AEZA_202_221 | 20     | 12           | 1          |

✘ = Omitted due to having <2 predicted contacts

● = Omitted due to having <2 predicted contacts remaining after ignoring those which were never satisfied (Sphinx only)

#### 4. Membrane protein target set results

##### (b) Full Sphinx results

Best = RMSD of the best (i.e. closest to native) decoy generated

Best of Top 500 = RMSD of the best decoy remaining in the set after filtering using Sphinx's scoring function

Top Ranked = RMSD of the decoy predicted to be the best by the SOAP-Loop scoring function

Best of Top 5 = RMSD of the best decoy in the top five as ranked by SOAP-Loop

All RMSDs are global backbone RMSDs.

| Target          | Length | Best | Best of Top 500 |             | Top Ranked   |             | Best of Top 5 |             |
|-----------------|--------|------|-----------------|-------------|--------------|-------------|---------------|-------------|
|                 |        |      | Normal          | Contacts    | Normal       | Contacts    | Normal        | Contacts    |
| 4BVNA_195_204   | 10     | 0.20 | 0.20            | 0.20        | 0.30         | 0.30        | 0.30          | <b>0.20</b> |
| 5LWEA_244_253   | 10     | 0.94 | <b>1.09</b>     | 1.18        | <b>1.27</b>  | 1.35        | <b>1.27</b>   | 1.35        |
| 2ZXEA_353_362   | 10     | 0.33 | <b>0.33</b>     | 0.41        | 0.49         | <b>0.41</b> | 0.41          | 0.41        |
| 5HVXA_154_163   | 10     | 0.23 | 0.23            | 0.23        | <b>0.37</b>  | 0.52        | <b>0.32</b>   | 0.38        |
| 2ERVA_129_138   | 10     | 1.88 | 2.16            | <b>2.00</b> | 8.43         | <b>4.51</b> | 7.55          | <b>4.36</b> |
| 5KLBA_1153_1162 | 10     | 0.22 | 0.30            | <b>0.24</b> | 0.45         | 0.45        | 0.45          | <b>0.38</b> |
| 4C9GA_258_267   | 10     | 0.35 | 0.40            | <b>0.35</b> | 0.92         | 0.92        | <b>0.44</b>   | 0.51        |
| 4ALOA_53_62     | 10     | 0.30 | 0.30            | 0.30        | 0.45         | 0.45        | 0.41          | 0.41        |
| 2YNKA_225_234   | 10     | 1.43 | 1.77            | <b>1.43</b> | <b>4.11</b>  | 6.41        | <b>4.11</b>   | 4.84        |
| 2RH1A_137_146   | 10     | 0.52 | <b>0.52</b>     | 3.91        | <b>4.89</b>  | 4.95        | <b>4.83</b>   | 4.87        |
| 2E3QA_407_417   | 11     | 0.92 | 2.70            | <b>2.15</b> | <b>5.27</b>  | 8.13        | 3.25          | <b>2.15</b> |
| 3GIAA_173_183   | 11     | 0.59 | 0.59            | 0.59        | 0.92         | 0.92        | 0.59          | 0.59        |
| 3QE7A_145_155   | 11     | 1.45 | 3.02            | <b>2.60</b> | <b>8.52</b>  | 8.58        | 8.23          | 8.23        |
| 4D65A_25_35     | 11     | 0.87 | 1.00            | <b>0.87</b> | 1.47         | 1.47        | 1.47          | 1.47        |
| 4FSPA_331_341   | 11     | 1.91 | <b>5.87</b>     | 5.99        | 7.50         | 7.50        | 7.50          | <b>5.99</b> |
| 4IKVA_52_62     | 11     | 0.26 | 0.49            | <b>0.26</b> | 9.71         | <b>0.42</b> | 5.75          | <b>0.42</b> |
| 4KT0F_94_104    | 11     | 1.00 | 1.03            | <b>1.00</b> | 7.69         | <b>1.54</b> | 1.06          | 1.06        |
| 4U4VA_285_295   | 11     | 0.34 | 0.34            | 0.34        | 0.54         | 0.54        | 0.54          | 0.54        |
| 5D91A_139_149   | 11     | 0.64 | 0.64            | 0.64        | <b>0.70</b>  | 0.76        | 0.67          | 0.67        |
| 5DL5A_390_400   | 11     | 1.70 | 1.78            | 1.78        | 2.66         | 2.66        | 2.66          | 2.66        |
| 1KF6C_94_105    | 12     | 0.71 | 3.27            | <b>0.89</b> | 6.39         | 6.39        | 5.03          | <b>4.83</b> |
| 2GSMA_215_226   | 12     | 0.24 | <b>0.24</b>     | 0.39        | <b>0.30</b>  | 0.70        | <b>0.28</b>   | 0.51        |
| 2R83A_298_309   | 12     | 2.07 | 3.12            | <b>2.14</b> | 7.84         | <b>6.90</b> | 6.67          | <b>6.59</b> |
| 2W16A_699_710   | 12     | 1.53 | 1.57            | <b>1.53</b> | 1.90         | 1.90        | 1.67          | 1.67        |
| 3W54A_229_240   | 12     | 1.60 | 2.89            | <b>2.11</b> | 4.39         | <b>3.97</b> | 3.76          | <b>2.58</b> |
| 4KNFA_168_179   | 12     | 1.25 | <b>1.27</b>     | 1.76        | <b>4.89</b>  | 5.02        | <b>3.84</b>   | 4.95        |
| 4Q35A_220_231   | 12     | 1.99 | <b>2.54</b>     | 2.85        | 6.77         | 6.77        | 5.83          | <b>5.45</b> |
| 4UVMA_397_408   | 12     | 1.80 | 2.06            | <b>1.83</b> | 2.06         | <b>1.83</b> | 2.06          | <b>1.83</b> |
| 5C6PA_46_57     | 12     | 1.66 | <b>2.43</b>     | 2.84        | 3.71         | <b>3.68</b> | <b>3.25</b>   | 3.68        |
| 5DL6A_236_247   | 12     | 0.88 | 0.88            | 0.88        | <b>7.00</b>  | 9.76        | 7.00          | <b>3.95</b> |
| 5GLIA_204_215   | 12     | 1.60 | <b>1.99</b>     | 4.17        | <b>5.35</b>  | 6.06        | <b>5.00</b>   | 5.24        |
| 5SYTA_148_159   | 12     | 0.47 | 0.47            | 0.47        | 0.60         | 0.60        | 0.47          | 0.47        |
| 1JB0F_90_102    | 13     | 1.03 | 2.01            | <b>1.57</b> | <b>5.32</b>  | 8.47        | <b>2.01</b>   | 3.32        |
| 1PPJC_204_216   | 13     | 0.42 | <b>0.42</b>     | 0.51        | 0.57         | 0.57        | 0.57          | <b>0.51</b> |
| 1ZHXA_252_264   | 13     | 0.30 | 0.30            | 0.30        | 0.30         | 0.30        | 0.30          | 0.30        |
| 2CFQA_137_149   | 13     | 0.89 | <b>0.89</b>     | 0.91        | <b>0.97</b>  | 1.04        | <b>0.94</b>   | 0.97        |
| 2QKSA_66_78     | 13     | 2.63 | <b>3.98</b>     | 4.35        | <b>7.10</b>  | 9.43        | <b>5.26</b>   | 7.90        |
| 2WSWA_163_175   | 13     | 0.37 | 0.37            | 0.37        | 0.64         | 0.64        | 0.41          | 0.41        |
| 3ABMJ_13_25     | 13     | 0.84 | <b>1.07</b>     | 1.69        | 8.63         | <b>6.88</b> | 3.07          | <b>1.70</b> |
| 3CN5A_148_160   | 13     | 0.37 | 0.46            | <b>0.37</b> | 0.50         | <b>0.40</b> | 0.46          | <b>0.37</b> |
| 3RKOD_58_70     | 13     | 2.71 | 3.39            | <b>2.71</b> | <b>8.81</b>  | 8.97        | <b>7.78</b>   | 8.52        |
| 3VY8X_20_32     | 13     | 2.28 | 3.99            | <b>3.45</b> | <b>5.72</b>  | 6.81        | 5.72          | <b>5.54</b> |
| 1OKCA_239_252   | 14     | 1.62 | 1.62            | 1.62        | 6.09         | <b>4.26</b> | 3.14          | <b>2.39</b> |
| 4CU4A_513_526   | 14     | 0.35 | 0.40            | <b>0.35</b> | 0.52         | 0.52        | 0.52          | 0.52        |
| 4RJWA_349_362   | 14     | 0.41 | 0.41            | 0.41        | 0.84         | 0.84        | 0.41          | 0.41        |
| 5AEZA_366_379   | 14     | 0.14 | 0.14            | 0.14        | 0.34         | 0.34        | 0.26          | 0.26        |
| 5C6PA_314_327   | 14     | 1.37 | 1.37            | 1.37        | 5.76         | <b>1.37</b> | 5.57          | <b>1.37</b> |
| 5IVAA_112_125   | 14     | 2.44 | <b>3.36</b>     | 6.85        | <b>12.30</b> | 14.36       | <b>9.48</b>   | 10.84       |
| 1U7GA_333_347   | 15     | 0.67 | 0.67            | 0.67        | 9.21         | <b>0.77</b> | 0.77          | <b>0.69</b> |
| 2B2HA_320_334   | 15     | 3.02 | <b>4.89</b>     | 4.93        | 7.97         | 7.97        | <b>7.33</b>   | 7.84        |
| 2E3QA_507_521   | 15     | 2.54 | 3.48            | <b>3.27</b> | 7.72         | <b>7.06</b> | <b>4.25</b>   | 4.34        |
| 2FGRA_156_170   | 15     | 0.21 | <b>0.21</b>     | 0.41        | 0.41         | 0.41        | <b>0.33</b>   | 0.41        |
| 2WSWA_302_316   | 15     | 0.60 | 0.60            | 0.60        | 0.64         | 0.64        | 0.64          | 0.64        |
| 3NSGA_194_208   | 15     | 1.78 | <b>2.51</b>     | 3.44        | <b>2.89</b>  | 4.09        | <b>2.51</b>   | 3.87        |
| 3RSTA_195_209   | 15     | 0.22 | 0.22            | 0.22        | 11.33        | <b>0.39</b> | 0.39          | <b>0.22</b> |
| 4CU4A_651_665   | 15     | 0.35 | 0.49            | <b>0.35</b> | 0.96         | <b>0.68</b> | 0.49          | <b>0.40</b> |
| 4D65A_238_252   | 15     | 1.98 | 2.32            | <b>2.16</b> | 19.93        | 19.93       | <b>3.03</b>   | 19.01       |
| 4YMKA_300_314   | 15     | 0.91 | 0.91            | 0.91        | 1.03         | 1.03        | 0.91          | 0.91        |
| 2W16A_595_610   | 16     | 0.79 | 3.62            | <b>0.79</b> | 8.29         | <b>1.06</b> | 6.47          | <b>0.79</b> |
| 3PBLA_170_185   | 16     | 2.67 | 3.05            | 3.05        | 11.44        | 11.44       | 8.42          | 8.42        |
| 5LX9A_331_346   | 16     | 0.47 | 5.30            | <b>0.47</b> | 7.93         | <b>1.40</b> | 6.41          | <b>0.54</b> |

#### 4. Membrane protein target set results (b) Full Sphinx results (cont.)

| Target          | Length | Best | Best of Top 500 |             | Top Ranked   |              | Best of Top 5 |              |
|-----------------|--------|------|-----------------|-------------|--------------|--------------|---------------|--------------|
|                 |        |      | Normal          | Contacts    | Normal       | Contacts     | Normal        | Contacts     |
| 1FOEC_1250_1266 | 17     | 2.15 | 3.68            | <b>3.51</b> | 7.73         | <b>5.15</b>  | <b>4.94</b>   | 4.97         |
| 3DWOX_361_377   | 17     | 2.23 | 8.62            | <b>3.80</b> | 15.50        | <b>9.88</b>  | <b>9.50</b>   | 9.88         |
| 3RKOB_356_372   | 17     | 1.40 | 1.40            | 1.40        | 1.61         | 1.61         | 1.52          | 1.52         |
| 3RKOC_367_383   | 17     | 1.66 | 1.66            | 1.66        | <b>16.63</b> | 16.67        | 15.25         | <b>11.43</b> |
| 3UG9A_140_156   | 17     | 0.41 | 0.41            | 0.41        | 0.42         | 0.42         | 0.41          | 0.41         |
| 3W4TA_219_235   | 17     | 0.54 | 0.54            | 0.54        | 1.37         | 1.37         | 0.67          | <b>0.65</b>  |
| 4C7RA_210_226   | 17     | 0.53 | 0.53            | 0.53        | 0.67         | 0.67         | 0.53          | 0.53         |
| 5DSGA_176_192   | 17     | 0.69 | 0.69            | 0.69        | 9.23         | <b>0.69</b>  | 0.69          | 0.69         |
| 2BHVA_199_216   | 18     | 1.99 | 2.81            | 2.81        | <b>12.08</b> | 20.83        | <b>6.57</b>   | 14.92        |
| 3FHHA_76_93     | 18     | 4.12 | 4.12            | 4.12        | 13.54        | 13.54        | 4.43          | 4.43         |
| 3NSGA_233_250   | 18     | 0.96 | 0.96            | 0.96        | 1.05         | 1.05         | 1.04          | <b>0.96</b>  |
| 4C7RA_120_137   | 18     | 0.68 | 0.68            | 0.68        | 0.68         | 0.68         | 0.68          | 0.68         |
| 4UVMA_197_214   | 18     | 2.34 | 2.34            | 2.34        | 3.46         | 3.46         | 3.46          | 3.46         |
| 2B2HA_138_156   | 19     | 0.71 | <b>0.71</b>     | 0.79        | 1.01         | 1.01         | <b>0.71</b>   | 0.79         |
| 3D9SA_109_127   | 19     | 0.33 | 0.33            | 0.33        | 0.41         | 0.41         | 0.36          | 0.36         |
| 3GD8A_137_155   | 19     | 0.89 | 0.89            | 0.89        | 4.86         | <b>1.05</b>  | 1.05          | 1.05         |
| 3VY8X_152_170   | 19     | 2.81 | 4.99            | <b>4.58</b> | 11.84        | <b>8.08</b>  | 5.21          | <b>5.19</b>  |
| 3WQJA_67_85     | 19     | 0.59 | 0.59            | 0.59        | 1.09         | 1.09         | 0.78          | 0.78         |
| 4FBZA_61_79     | 19     | 0.80 | 0.80            | 0.80        | 1.34         | 1.34         | 0.91          | 0.91         |
| 4PXZA_162_180   | 19     | 3.78 | 5.00            | 5.00        | 8.15         | 8.15         | 5.81          | 5.81         |
| 4QIDB_70_88     | 19     | 0.62 | 0.62            | 0.62        | 0.94         | 0.94         | 0.94          | 0.94         |
| 2F2BA_123_142   | 20     | 0.45 | 0.45            | 0.45        | 0.48         | 0.48         | 0.45          | 0.45         |
| 2WJNM_91_110    | 20     | 0.44 | 0.44            | 0.44        | 0.58         | 0.58         | 0.44          | 0.44         |
| 3BS0A_109_128   | 20     | 1.55 | <b>7.62</b>     | 7.83        | <b>12.16</b> | 16.06        | <b>10.57</b>  | 12.71        |
| 3FHHA_612_631   | 20     | 3.37 | 11.17           | <b>9.30</b> | 18.70        | <b>12.43</b> | 17.00         | <b>12.43</b> |
| 3WO6A_156_175   | 20     | 1.05 | 1.05            | 1.05        | 9.08         | 9.08         | <b>8.20</b>   | 9.08         |
| 4IB4A_107_126   | 20     | 1.23 | 1.23            | 1.23        | 10.31        | <b>6.02</b>  | 4.54          | <b>1.23</b>  |
| 4RDQA_255_274   | 20     | 0.95 | <b>1.15</b>     | 1.47        | 10.47        | <b>1.59</b>  | 2.81          | <b>1.59</b>  |
| 5AEZA_202_221   | 20     | 0.29 | <b>0.29</b>     | 0.34        | 0.62         | <b>0.49</b>  | <b>0.29</b>   | 0.44         |

#### Average results:

| Length | No. Targets | Best | Best of Top 500 |             | Top Ranked  |             | Best of Top 5 |             |
|--------|-------------|------|-----------------|-------------|-------------|-------------|---------------|-------------|
|        |             |      | Normal          | Contacts    | Normal      | Contacts    | Normal        | Contacts    |
| 10     | 10          | 0.64 | <b>0.73</b>     | 1.02        | 2.17        | <b>2.03</b> | 2.01          | <b>1.77</b> |
| 11     | 10          | 0.97 | 1.75            | <b>1.62</b> | 4.50        | <b>3.25</b> | 3.17          | <b>2.38</b> |
| 12     | 12          | 1.32 | 1.89            | <b>1.82</b> | <b>4.27</b> | 4.47        | 3.74          | <b>3.48</b> |
| 13     | 10          | 1.18 | 1.69            | <b>1.62</b> | <b>3.85</b> | 4.35        | <b>2.65</b>   | 2.95        |
| 14     | 6           | 1.05 | <b>1.22</b>     | 1.79        | 4.31        | <b>3.61</b> | 3.23          | <b>2.63</b> |
| 15     | 10          | 1.23 | <b>1.63</b>     | 1.70        | 6.21        | <b>4.30</b> | <b>2.07</b>   | 3.83        |
| 16     | 3           | 1.31 | 3.99            | <b>1.44</b> | 9.22        | <b>4.63</b> | 7.10          | <b>3.25</b> |
| 17     | 8           | 1.20 | 2.19            | <b>1.57</b> | 6.65        | <b>4.56</b> | 4.19          | <b>3.76</b> |
| 18     | 5           | 2.02 | 2.18            | 2.18        | <b>6.16</b> | 7.91        | <b>3.24</b>   | 4.89        |
| 19     | 8           | 1.32 | 1.74            | <b>1.70</b> | 3.71        | <b>2.76</b> | <b>1.97</b>   | 1.98        |
| 20     | 8           | 1.17 | 2.92            | <b>2.76</b> | 7.80        | <b>5.84</b> | 5.54          | <b>4.80</b> |
| ALL    | 90          | 1.18 | 1.84            | <b>1.73</b> | 4.98        | <b>4.15</b> | 3.27          | <b>3.17</b> |

#### 4. Membrane protein target set results (c) Full MODELLER results

Best = RMSD of the best (i.e. closest to native) decoy generated

Top Ranked = RMSD of the decoy predicted to be the best by the SOAP-Loop scoring function

Best of Top 5 = RMSD of the best decoy in the top five as ranked by SOAP-Loop

All RMSDs are global backbone RMSDs.

| Target          | Length | Best        |             | Top Ranked  |              | Best of Top 5 |              |
|-----------------|--------|-------------|-------------|-------------|--------------|---------------|--------------|
|                 |        | Normal      | Contacts    | Normal      | Contacts     | Normal        | Contacts     |
| 4BVNA_195_204   | 10     | 1.13        | <b>1.02</b> | 2.61        | <b>2.14</b>  | 2.02          | <b>1.29</b>  |
| 5LWEA_244_253   | 10     | <b>1.70</b> | 2.52        | <b>2.85</b> | 5.66         | <b>2.27</b>   | 2.52         |
| 2ZXEA_353_362   | 10     | 0.58        | <b>0.39</b> | 0.83        | <b>0.45</b>  | 0.58          | <b>0.45</b>  |
| 5HVXA_154_163   | 10     | 1.44        | <b>1.38</b> | <b>1.44</b> | 2.68         | <b>1.44</b>   | 1.92         |
| 2ERVA_129_138   | 10     | 2.33        | <b>1.94</b> | 7.58        | <b>5.55</b>  | 3.17          | <b>2.96</b>  |
| 5KLBA_1153_1162 | 10     | 2.01        | <b>1.27</b> | 4.37        | <b>3.39</b>  | 3.27          | <b>2.40</b>  |
| 4C9GA_258_267   | 10     | <b>1.49</b> | 1.66        | 3.34        | <b>2.90</b>  | <b>2.73</b>   | 2.89         |
| 4AL0A_53_62     | 10     | 2.10        | <b>1.41</b> | <b>2.20</b> | 2.38         | 2.20          | <b>1.41</b>  |
| 2YNKA_225_234   | 10     | <b>1.36</b> | 1.48        | 2.42        | <b>2.37</b>  | 2.42          | <b>1.48</b>  |
| 2RH1A_137_146   | 10     | <b>1.34</b> | 1.35        | 6.28        | <b>5.84</b>  | 5.15          | <b>1.97</b>  |
| 2E3QA_407_417   | 11     | 1.20        | <b>1.16</b> | 1.20        | <b>1.16</b>  | 1.20          | <b>1.16</b>  |
| 3GIAA_173_183   | 11     | 2.02        | <b>1.08</b> | 2.57        | <b>1.09</b>  | 2.02          | <b>1.08</b>  |
| 3QE7A_145_155   | 11     | 1.47        | <b>1.39</b> | 8.40        | <b>4.39</b>  | 7.74          | <b>3.74</b>  |
| 4D65A_25_35     | 11     | 1.54        | <b>1.46</b> | <b>1.78</b> | 2.13         | <b>1.78</b>   | 1.86         |
| 4FSPA_331_341   | 11     | 4.45        | <b>3.67</b> | 13.54       | <b>10.51</b> | 10.18         | <b>9.22</b>  |
| 4IKVA_52_62     | 11     | <b>2.62</b> | 3.00        | <b>7.06</b> | 9.52         | <b>3.68</b>   | 8.12         |
| 4KT0F_94_104    | 11     | <b>2.67</b> | 2.77        | <b>3.59</b> | 5.39         | 3.59          | <b>3.41</b>  |
| 4U4VA_285_295   | 11     | 2.06        | <b>1.54</b> | <b>2.06</b> | 2.34         | 2.06          | <b>1.61</b>  |
| 5D91A_139_149   | 11     | 1.37        | <b>1.30</b> | 5.14        | <b>4.33</b>  | 4.69          | <b>4.13</b>  |
| 5DL5A_390_400   | 11     | <b>1.69</b> | 2.14        | 3.74        | <b>3.61</b>  | <b>1.69</b>   | 2.95         |
| 1KF6C_94_105    | 12     | 1.78        | <b>1.31</b> | 5.72        | <b>3.08</b>  | 5.72          | <b>3.08</b>  |
| 2GSMA_215_226   | 12     | 1.97        | <b>1.61</b> | <b>3.65</b> | 4.52         | <b>2.73</b>   | 4.52         |
| 2R83A_298_309   | 12     | 2.18        | <b>1.73</b> | <b>2.68</b> | 4.84         | 2.68          | <b>2.50</b>  |
| 2W16A_699_710   | 12     | 2.60        | <b>1.64</b> | 3.94        | <b>1.80</b>  | 3.33          | <b>1.64</b>  |
| 3W54A_229_240   | 12     | 1.77        | <b>1.77</b> | <b>2.31</b> | 2.86         | <b>1.77</b>   | 1.88         |
| 4KNFA_168_179   | 12     | 2.90        | <b>2.64</b> | <b>5.45</b> | 6.06         | 5.45          | <b>4.53</b>  |
| 4Q35A_220_231   | 12     | <b>1.65</b> | 2.27        | 5.14        | <b>4.40</b>  | 4.35          | <b>2.89</b>  |
| 4UVMA_397_408   | 12     | <b>2.48</b> | 2.60        | <b>2.48</b> | 2.68         | <b>2.48</b>   | 2.68         |
| 5C6PA_46_57     | 12     | <b>3.04</b> | 3.28        | 11.43       | <b>9.99</b>  | 5.25          | <b>3.28</b>  |
| 5DL6A_236_247   | 12     | 3.73        | <b>3.64</b> | 7.60        | <b>7.59</b>  | 7.60          | <b>7.59</b>  |
| 5GLIA_204_215   | 12     | <b>1.25</b> | 1.81        | <b>5.59</b> | 6.43         | <b>1.54</b>   | 6.43         |
| 5SYTA_148_159   | 12     | 1.49        | <b>1.32</b> | 4.64        | <b>2.29</b>  | 1.49          | <b>1.40</b>  |
| 1JB0F_90_102    | 13     | 3.26        | <b>2.83</b> | 4.94        | <b>3.94</b>  | 4.19          | <b>3.47</b>  |
| 1PPJC_204_216   | 13     | <b>2.60</b> | 2.72        | 3.95        | <b>3.71</b>  | 3.95          | <b>2.72</b>  |
| 1ZHXA_252_264   | 13     | <b>3.10</b> | 3.18        | 10.09       | <b>7.90</b>  | <b>4.24</b>   | 7.08         |
| 2CFQA_137_149   | 13     | 3.73        | <b>3.44</b> | 5.32        | <b>3.69</b>  | 5.04          | <b>3.69</b>  |
| 2QKSA_66_78     | 13     | 2.97        | <b>2.90</b> | 9.19        | <b>8.34</b>  | <b>5.15</b>   | 5.50         |
| 2WSWA_163_175   | 13     | 2.34        | <b>1.51</b> | 5.18        | <b>1.51</b>  | 2.34          | <b>1.51</b>  |
| 3ABMJ_13_25     | 13     | <b>3.27</b> | 3.39        | 10.94       | <b>5.78</b>  | 6.93          | <b>5.51</b>  |
| 3CN5A_148_160   | 13     | 1.44        | <b>0.68</b> | 1.74        | <b>0.68</b>  | 1.74          | <b>0.68</b>  |
| 3RKOD_58_70     | 13     | <b>0.68</b> | 0.85        | <b>0.68</b> | 0.88         | <b>0.68</b>   | 0.85         |
| 3V2YA_281_293   | 13     | 2.90        | <b>2.60</b> | 5.57        | <b>2.60</b>  | 2.90          | <b>2.60</b>  |
| 3VY8X_20_32     | 13     | <b>3.82</b> | 4.73        | 6.23        | <b>6.03</b>  | <b>5.89</b>   | 6.03         |
| 1OKCA_239_252   | 14     | <b>1.83</b> | 2.00        | <b>1.83</b> | 2.90         | <b>1.83</b>   | 2.76         |
| 4CU4A_513_526   | 14     | 3.05        | <b>1.79</b> | <b>4.86</b> | 7.08         | 3.05          | <b>1.79</b>  |
| 4RJWA_349_362   | 14     | <b>3.39</b> | 3.96        | <b>7.27</b> | 8.76         | 6.42          | <b>5.96</b>  |
| 4XK8L_13_26     | 14     | 3.01        | <b>2.88</b> | <b>4.86</b> | 5.52         | 4.86          | <b>4.56</b>  |
| 5AEZA_366_379   | 14     | 2.54        | <b>2.21</b> | 9.82        | <b>4.60</b>  | 4.19          | <b>3.23</b>  |
| 5C6PA_314_327   | 14     | 3.57        | <b>2.48</b> | <b>3.76</b> | 3.84         | 3.76          | <b>2.48</b>  |
| 5IVAA_112_125   | 14     | <b>2.34</b> | 2.55        | 4.87        | <b>3.77</b>  | 2.66          | <b>2.55</b>  |
| 1U7GA_333_347   | 15     | <b>2.75</b> | 3.74        | <b>4.55</b> | 5.09         | 4.55          | <b>3.87</b>  |
| 2B2HA_320_334   | 15     | <b>5.82</b> | 5.90        | <b>7.34</b> | 10.01        | <b>6.92</b>   | 8.91         |
| 2E3QA_507_521   | 15     | 2.29        | <b>2.12</b> | 5.02        | <b>3.92</b>  | 4.60          | <b>3.92</b>  |
| 2FGRA_156_170   | 15     | 3.23        | <b>3.07</b> | 12.10       | <b>10.54</b> | 11.87         | <b>10.23</b> |
| 2WSWA_302_316   | 15     | 3.24        | <b>3.02</b> | 8.34        | <b>4.11</b>  | 4.98          | <b>3.92</b>  |
| 3NSGA_194_208   | 15     | 2.71        | <b>2.31</b> | <b>3.44</b> | 5.01         | 3.16          | <b>2.44</b>  |
| 3RSTA_195_209   | 15     | <b>2.25</b> | 2.81        | 9.07        | <b>3.31</b>  | 3.51          | <b>3.31</b>  |
| 4CU4A_651_665   | 15     | 4.66        | <b>2.13</b> | 7.50        | <b>2.13</b>  | 5.05          | <b>2.13</b>  |
| 4D65A_238_252   | 15     | 2.73        | <b>2.70</b> | 3.55        | <b>3.14</b>  | 3.55          | <b>3.14</b>  |
| 4YMKA_300_314   | 15     | 3.62        | <b>2.47</b> | 5.65        | <b>4.18</b>  | 4.34          | <b>3.53</b>  |
| 2W16A_595_610   | 16     | <b>3.68</b> | 3.76        | <b>5.98</b> | 9.23         | <b>5.98</b>   | 8.05         |
| 3PBLA_170_185   | 16     | 2.88        | <b>2.53</b> | 8.11        | <b>7.53</b>  | 4.71          | <b>3.37</b>  |

#### 4. Membrane protein target set results (c) Full MODELLER results (cont.)

| Target          | Length | Best        |             | Top Ranked   |              | Best of Top 5 |             |
|-----------------|--------|-------------|-------------|--------------|--------------|---------------|-------------|
|                 |        | Normal      | Contacts    | Normal       | Contacts     | Normal        | Contacts    |
| 5LX9A_331_346   | 16     | 4.63        | <b>4.07</b> | 14.76        | <b>11.46</b> | 7.20          | <b>4.92</b> |
| 1FOEC_1250_1266 | 17     | 4.60        | <b>3.72</b> | <b>6.10</b>  | 7.86         | <b>5.80</b>   | 5.90        |
| 3DWOX_361_377   | 17     | 2.15        | <b>1.65</b> | 4.47         | <b>3.42</b>  | 2.15          | <b>1.65</b> |
| 3RKOB_356_372   | 17     | 3.70        | <b>1.84</b> | 4.54         | <b>2.09</b>  | 4.54          | <b>2.01</b> |
| 3RKOC_367_383   | 17     | 3.04        | <b>2.06</b> | 8.64         | <b>2.12</b>  | 3.04          | <b>2.06</b> |
| 3UG9A_140_156   | 17     | 3.80        | <b>2.59</b> | 5.79         | <b>2.59</b>  | 5.79          | <b>2.59</b> |
| 3W4TA_219_235   | 17     | 2.88        | <b>2.68</b> | 9.67         | <b>7.18</b>  | <b>2.88</b>   | 4.91        |
| 4C7RA_210_226   | 17     | <b>3.22</b> | 3.50        | 4.80         | <b>4.50</b>  | <b>3.32</b>   | 4.50        |
| 5DSGA_176_192   | 17     | 4.06        | <b>3.52</b> | 12.16        | <b>9.63</b>  | 9.98          | <b>4.85</b> |
| 2BHVA_199_216   | 18     | 3.97        | <b>2.10</b> | 17.16        | <b>4.44</b>  | 8.58          | <b>2.55</b> |
| 3FHHA_76_93     | 18     | <b>2.09</b> | 2.24        | 4.65         | <b>4.51</b>  | <b>3.55</b>   | 4.30        |
| 3NSGA_233_250   | 18     | <b>2.64</b> | 3.57        | 5.61         | <b>4.90</b>  | <b>2.64</b>   | 3.57        |
| 4C7RA_120_137   | 18     | 4.17        | <b>3.32</b> | <b>7.45</b>  | 10.62        | 7.45          | <b>5.04</b> |
| 4UVMA_197_214   | 18     | <b>3.00</b> | 3.04        | 6.30         | <b>5.70</b>  | 5.27          | <b>4.49</b> |
| 2B2HA_138_156   | 19     | 4.47        | <b>3.17</b> | 8.33         | <b>3.78</b>  | 8.33          | <b>3.39</b> |
| 3D9SA_109_127   | 19     | 3.21        | <b>2.81</b> | 7.64         | <b>6.22</b>  | 7.64          | <b>3.87</b> |
| 3GD8A_137_155   | 19     | 3.72        | <b>2.81</b> | 7.30         | <b>5.18</b>  | 4.03          | <b>3.21</b> |
| 3VY8X_152_170   | 19     | 5.48        | <b>4.24</b> | <b>11.18</b> | 14.69        | 7.86          | <b>7.82</b> |
| 3WQJA_67_85     | 19     | 3.96        | <b>3.35</b> | 6.60         | <b>4.28</b>  | <b>3.96</b>   | 4.28        |
| 4FBZA_61_79     | 19     | 3.33        | <b>2.50</b> | 5.01         | <b>3.43</b>  | 3.75          | <b>2.73</b> |
| 4PXZA_162_180   | 19     | 3.86        | <b>3.08</b> | 17.09        | <b>8.57</b>  | 8.61          | <b>4.41</b> |
| 4QIDB_70_88     | 19     | 4.23        | <b>3.74</b> | 10.83        | <b>8.62</b>  | <b>6.67</b>   | 8.62        |
| 2F2BA_123_142   | 20     | 4.36        | <b>3.85</b> | <b>4.36</b>  | 4.60         | <b>4.36</b>   | 4.60        |
| 2WJNM_91_110    | 20     | 4.90        | <b>2.80</b> | 14.32        | <b>13.04</b> | 7.30          | <b>2.80</b> |
| 3BS0A_109_128   | 20     | 4.75        | <b>4.00</b> | <b>11.25</b> | 17.78        | <b>7.41</b>   | 7.97        |
| 3FHHA_612_631   | 20     | 3.52        | <b>1.91</b> | 11.91        | <b>5.39</b>  | 6.26          | <b>3.16</b> |
| 3WO6A_156_175   | 20     | 4.78        | <b>4.73</b> | 14.24        | <b>7.48</b>  | 10.66         | <b>7.48</b> |
| 4IB4A_107_126   | 20     | 4.39        | <b>3.89</b> | 12.24        | <b>7.87</b>  | 11.86         | <b>7.87</b> |
| 4RDQA_255_274   | 20     | <b>3.43</b> | 3.50        | <b>9.26</b>  | 10.46        | 7.70          | <b>7.44</b> |
| 5AEZA_202_221   | 20     | <b>3.69</b> | 4.21        | 12.29        | <b>5.77</b>  | <b>4.92</b>   | 5.15        |

#### Average results:

| Length | No. Targets | Best   |             | Top Ranked |             | Best of Top 5 |             |
|--------|-------------|--------|-------------|------------|-------------|---------------|-------------|
|        |             | Normal | Contacts    | Normal     | Contacts    | Normal        | Contacts    |
| 10     | 10          | 1.55   | <b>1.44</b> | 3.39       | <b>3.34</b> | 2.53          | <b>1.93</b> |
| 11     | 10          | 2.11   | <b>1.95</b> | 4.91       | <b>4.45</b> | 3.86          | <b>3.73</b> |
| 12     | 12          | 2.24   | <b>2.14</b> | 5.05       | <b>4.71</b> | 3.70          | <b>3.54</b> |
| 13     | 11          | 2.74   | <b>2.62</b> | 5.80       | <b>4.09</b> | 3.91          | <b>3.60</b> |
| 14     | 7           | 2.82   | <b>2.55</b> | 5.32       | <b>5.21</b> | 3.82          | <b>3.33</b> |
| 15     | 10          | 3.33   | <b>3.03</b> | 6.66       | <b>5.14</b> | 5.25          | <b>4.54</b> |
| 16     | 3           | 3.73   | <b>3.45</b> | 9.61       | <b>9.40</b> | 5.96          | <b>5.45</b> |
| 17     | 8           | 3.43   | <b>2.70</b> | 7.02       | <b>4.92</b> | 4.69          | <b>3.56</b> |
| 18     | 5           | 3.18   | <b>2.85</b> | 8.23       | <b>6.04</b> | 5.50          | <b>3.99</b> |
| 19     | 8           | 4.03   | <b>3.21</b> | 9.25       | <b>6.85</b> | 6.36          | <b>4.79</b> |
| 20     | 8           | 4.23   | <b>3.61</b> | 11.23      | <b>9.05</b> | 7.56          | <b>5.81</b> |
| ALL    | 92          | 2.90   | <b>2.58</b> | 6.54       | <b>5.35</b> | 4.62          | <b>3.88</b> |
